1 **Crystal structure of a human plasma membrane phospholipid**

2 **flippase**

3

4 Hanayo Nakanishi<sup>1</sup>, Katsumasa Irie<sup>1,2</sup>, Katsumori Segawa<sup>3</sup>, Kazuya Hasegawa<sup>4</sup>,  
5 Yoshinori Fujiyoshi<sup>5,6</sup>, Sigekazu Nagata<sup>3</sup> & Kazuhiro Abe<sup>1,2,\*</sup>

6 <sup>1</sup>Cellular and Structural Physiology Institute; <sup>2</sup>Graduate School of Pharmaceutical  
7 Sciences, Nagoya University, Nagoya 464-8601, Japan; <sup>3</sup>WPI Immunology Frontier  
8 Research Center, Osaka University, Osaka 565-0871, Japan; <sup>4</sup>Japan Synchrotron  
9 Radiation Research Institute, 1-1-1 Kouto, Sayo 679-5198, Japan; <sup>5</sup>TMDU Advanced  
10 Research Institute, Tokyo Medical and Dental University, 1-5-45, Yushima, Bunkyo-ku,  
11 Tokyo 113-8510, Japan; <sup>6</sup>CeSPIA Inc., 2-1-1, Otemachi, Chiyoda, Tokyo 100-0004,  
12 Japan

13

14

15 **Abstract**

16 ATP11C, a member of P4-ATPase flippase, exclusively translocates phosphatidylserine  
17 from the outer to the inner leaflets of the plasma membrane, and maintains the  
18 asymmetric distribution of phosphatidylserine in the living cell. However, the  
19 mechanisms by which ATP11C translocates phosphatidylserine remain elusive. Here we  
20 show the crystal structures of a human plasma membrane flippase, ATP11C-CDC50A  
21 complex, in an outward-open E2P conformation. Two phosphatidylserine molecules are  
22 in a conduit that continues from the cell surface to the occlusion site in the middle of the  
23 membrane. Mutations in either of the phosphatidylserine binding sites or along the  
24 pathway between significantly impairs specific ATPase and transport activities. We  
25 propose a model for phosphatidylserine translocation from the outer to the inner leaflet  
26 of the plasma membrane.

27

## 28 **Introduction**

29           Phospholipids are asymmetrically distributed between the outer and inner  
30 leaflets in the plasma membrane of eukaryotic cells. Aminophospholipids such as  
31 phosphatidylserine (PtdSer) and phosphatidylethanolamine (PtdEtn) are confined to the  
32 inner leaflet, while phosphatidylcholine and sphingomyelin are enriched in the outer  
33 leaflet<sup>1</sup>. The asymmetric distribution of phospholipids is widely conserved in eukaryotes,  
34 being tuned for barrier functions and various signal transductions on the plasma  
35 membrane<sup>2</sup>. On occasion, this phospholipid asymmetry in the plasma membrane is  
36 disrupted, exposing PtdSer on the cell surface. Cells undergoing apoptosis expose  
37 PtdSer as an “eat me” signal to phagocytes<sup>3,4</sup>. Activated platelets also display PtdSer as  
38 a scaffold for clotting enzyme reactions<sup>5</sup>. The amphipathic nature of phospholipids  
39 prevents their spontaneous flip-flop movement across the lipid bilayer in most cases,  
40 and the translocation of phospholipids therefore needs membrane proteins to overcome  
41 the energetic barrier required for the phospholipid translocation<sup>2</sup>.

42           While scramblases mediate non-specific and bi-directional movement of  
43 phospholipids between inner and outer leaflets<sup>6</sup>, flippases exhibit ATP-driven,  
44 directional and up-hill translocation of phospholipids from the outer to inner leaflets  
45 against their concentration gradient across the membrane bilayer<sup>7,8,9</sup>. Different from  
46 other members of cation-transporting P-type ATPases<sup>10-13</sup>, Type IV P-type ATPase  
47 (P4-ATPase) comprises a subfamily of P-type ATPases that transports phospholipid<sup>14</sup>.  
48 Among all 14 members of P4-ATPase in humans, ATP11A and ATP11C work as  
49 aminophospholipid-specific flippases at the plasma membrane<sup>3,4</sup>. They require an  
50 accessory subunit, CDC50A, for their correct localization and the functional expression  
51 on the plasma membrane<sup>15-17</sup>. In fact, cells lacking ATP11A and ATP11C, or CDC50A  
52 almost completely lose flippase activity for PtdSer and PtdEtn at the plasma membrane,  
53 resulting in failure to maintain the asymmetric accumulation of PtdSer in the inner  
54 leaflet. Their inactivation causes PtdSer exposure on the cell surface. In apoptotic cells,  
55 ATP11A and ATP11C are subjected to a caspase-mediated proteolysis and irreversible  
56 inactivation. It is proposed that calcium ions likely also inhibit the flippase activity for  
57 calcium-dependent PtdSer exposure in activated platelets or lymphocytes<sup>18</sup>. Regulation  
58 of aminophospholipid asymmetry by flippases is physiologically important;  
59 ATP11A-deficient mice are embryonic lethal<sup>19</sup>, and ATP11C-deficient mice display  
60 pleiotropic phenotypes such as B-cell lymphopenia<sup>20,21</sup>, cholestasis<sup>22</sup>, mild anemia<sup>23</sup>,  
61 and dystocia. Recently, mutations in the ATP11C gene were identified in patients  
62 suffered from anemia<sup>24</sup>.

63           The directional translocation of specific phospholipids mediated by

64 P4-ATPases is achieved by the cyclic conversion of enzyme conformations, E1, E2 and  
65 their auto-phosphorylated forms E1P and E2P, similar to the Post-Albers type reaction  
66 scheme<sup>14,25</sup> for cation-transporting P-type ATPases. However, despite the huge size of  
67 phospholipids relative to inorganic cations, the mechanism by which P4-flippases  
68 translocate phospholipids across the membrane, the so-called “giant substrate problem”  
69 <sup>26,27</sup>, has remained elusive and yet is of considerable interest. Here, we describe a crystal  
70 structure of a *bona fide* human plasma membrane flippase ATP11C-CDC50A complex  
71 in the outward-open E2P conformation, analyzed to 3.9 Å resolution. Our structure has  
72 two PtdSer molecules simultaneously bound in the putative lipid translocating conduit.  
73 The structure, together with functional analyses, enable us to propose a molecular  
74 mechanism for the phospholipid translocation across the plasma membrane by ATP11C.

75

## 76 **Results and Discussion**

77

### 78 **Overall structure of the outward-open conformation**

79 Human ATP11C and CDC50A were expressed using the BacMam system (Fig.  
80 S1, Methods)<sup>28</sup>. Purified and deglycosylated proteins were mixed with  
81 dioleoylphosphatidylcholine (DOPC)<sup>29</sup>, and crystallized in the presence of phosphate  
82 analogue<sup>30</sup> beryllium fluoride (BeF<sub>x</sub>) and dioleoylphosphatidylserine (DOPS). Crystals  
83 were harvested in the presence of excess DOPS, which was key to preservation of  
84 crystal quality. X-ray diffraction data from more than 1,500 individual crystals were  
85 merged, and the structure was determined by molecular replacement using the atomic  
86 model of the E2BeF state of ATP8A1<sup>31</sup> as a search model, at a resolution of 3.9Å with  
87 acceptable statistics of  $R_{\text{work}}/R_{\text{free}} = 27.9/34.7$  (Fig. S1, Table S1). As is seen in most of  
88 the other crystallized P-type ATPases, molecular packing occurs as type I crystals in  
89 which complexes are embedded in the lipid bilayer<sup>32</sup>. The asymmetric unit of the crystal  
90 consists of four protomers of ATP11C-CDC50A. Due to different crystal contacts, the  
91 appearance of the electron density map differs significantly for each protomer (Fig. S2).  
92 Despite limited resolution, however, well-ordered regions, especially the  
93 transmembrane (TM) region of protomer A and B were visible at side chain level (Fig.  
94 S3). The overall molecular conformations of the four protomers are essentially the same,  
95 although structural variations in some of the loop structures exist (Fig. S2). We therefore  
96 focus on the well-ordered protomer A in what follows.

97 Like other members of the well-characterized, cation-transporting P-type  
98 ATPases<sup>11-13</sup>, the up-hill translocation of aminophospholipids by ATP11C is achieved  
99 according to the Post-Albers type reaction scheme<sup>14,25</sup> (Fig. 1A). The outward-open E2P

100 conformation captures PtdSer or PtdEtn on the outer leaflet and induces  
101 dephosphorylation of E2P, thus PtdSer- or PtdEtn-dependent ATP hydrolysis can be  
102 detected (Fig. 1B), similar to the inward transport of  $K^+$  by  $Na^+,K^+$ -ATPase and  
103  $H^+,K^+$ -ATPase. As we included  $BeF_x$  and PtdSer for the crystallization, the molecular  
104 conformation<sup>33</sup> was expected to be the outward-open E2P state in which PtdSer is bound  
105 to the conduit facing to the exoplasmic side (Fig. 1A). In fact, the overall structure of  
106 the ATP11C-CDC50A complex (Fig. 1C) is very close to the corresponding E2P  
107 structures of recently reported flippases yeast Drs2p-Cdc50p<sup>34</sup> and human  
108 ATP8A1-CDC50A<sup>31</sup> complexes. The sequence identities of each catalytic subunit are  
109 35.3% and 36.2%, respectively (Fig. S4 for sequence alignment)<sup>35</sup>. The molecular  
110 conformation is also defined by the relative orientations of the cytoplasmic domains<sup>36</sup>  
111 (actuator (A), phosphorylation (P) and nucleotide-binding (N) domains), and the  
112 arrangement of the ten transmembrane (TM) helices of the catalytic subunit ATP11C.  
113 The phosphate analogue  $BeF_x$  likely forms a covalent bond to the invariant aspartate in  
114 the <sup>409</sup>DKTG signature sequence, which is covered by the <sup>179</sup>DGES/T motif located on  
115 the surface of the A domain to prevent spontaneous dephosphorylation by the bulk water  
116 (Fig. S5). In this conformation, the N domain is segregated from the P domain, and is  
117 expected to be relatively flexible compared to the other two domains due to the lack of  
118 intimate inter-domain interactions, and this is consistent with its poor electron density  
119 (Fig. S2,3). The relative orientation of the A and P domains in ATP11C is close to those  
120 observed in Drs2p and ATP8A1 E2P states, and clearly different from that in the  
121 ATP8A1 E2-P<sub>i</sub> transition state (Fig. S5), indicating that the present ATP11C structure  
122 adopts an E2P state.

123         The CDC50A subunit consists of two TM helices with a long N-terminal tail  
124 and a short C-terminus on the cytoplasmic side, and a large exoplasmic domain in  
125 which four *N*-linked (Asn107, Asn180, Asn190 and Asn294) and one *O*-linked (Ser292)  
126 glycosylation sites are located. We extensively investigated various combinations of  
127 glycosylation site mutants to improve protein expression and crystal quality, and found  
128 that the Asn190Gln/Ser292Trp double mutant produced the best crystals. Because the  
129 samples were treated with endoglycosidase to remove excess glycans during  
130 purification, an acetylglucosamine (GlcNAc) moiety is retained on each three remaining  
131 *N*-linked glycosylation sites. Interestingly, PNGase treatment, which truncates all  
132 glycans including core GlcNAc, produced tiny crystals, suggesting that these GlcNAcs  
133 contribute to rather stable crystal packing. We modeled one GlcNAc moiety for each of  
134 the two sites (Asn107, Asn294), and three glycans at a position close to Asn180  
135 (Asn180-GlcNAc-GlcNAc-Man). The three glycans at Asn180 fit into a groove formed

136 between two lobes (lobe A and B) of CDC50A and Trp323 (in the connecting loop  
137 between TM3 and TM4 of ATP11C and conserved in mammalian flippases that requires  
138 CDC50A), like a wedge, thereby keeping them together and sterically protecting them  
139 from the endoglycosidase during purification (Fig. 1D).

140 The electron density map of the N domain allowed visualization of its overall  
141 folding at C $\alpha$  level, and made it possible to assign the location of the three caspase  
142 recognition sites (Fig. 1E,F). Inactivation of ATP11A or ATP11C by effector caspases  
143 requires cleavage of multiple caspase sites located on the N domain, and a single site  
144 cleavage is not enough for full inactivation of the flippase<sup>4,18</sup>. There are three  
145 caspase-recognition sites in ATP11C (site I – III, Fig. 1, Fig. S4), and these are located  
146 on loops at both ends of an  $\alpha$ -helix-containing region. Site I and site II are very close to  
147 each other at the N-terminal side of the helix, and site III is at the C-terminal side. This  
148 region, especially the  $\alpha$ -helical part in between caspase recognition sites, is located at  
149 the center of the N domain scaffold, and seems like a bolt that holds together the  
150 surrounding  $\alpha$ -helix and several  $\beta$ -sheets, and thus obviously important for N domain  
151 folding. Interaction between this helix and surrounding N domain segments may be  
152 sufficient to keep its fold even if one of the caspase sites is cleaved. Cleavage at both  
153 ends of the helix must lead to irreversible unfolding of the N domain which is required  
154 for the ATP binding. Note, all three sites are exposed on the same side of the N domain  
155 with a distance of around 35~40Å in between two regions (site I,II and site III). Such  
156 geometry of cleavage sites suggests that instantaneous two-site cleavage may occur by a  
157 caspase-3 dimer<sup>37</sup> upon apoptotic signal transduction, rather than single, independent  
158 cleavages, given that the distance between the catalytic center of the caspase-3 dimer is  
159 around 40Å.

160

### 161 **Outward-open conformation**

162 According to the reaction scheme of P4-flippase (Fig. 1A), the outward-open  
163 E2P state, mimicked by the BeF $_x$ -binding, is a reaction state responsible for the  
164 incorporation of PtdSer from the outer leaflet to the transport occlusion site. A structural  
165 requirement for the outward-open conformation is therefore the transient formation of a  
166 conduit that physically allows the translocation of the phospholipid head group from the  
167 outer leaflet to the occlusion site in the middle of the membrane. We found a  
168 longitudinal crevice in the peripheral region of TM in ATP11C (Fig. 2A, Fig. S6). The  
169 crevice is composed of TM2, TM4 and TM6 helices and runs along TM4, and is  
170 continuous from the exoplasmic surface of the lipid bilayer to the middle of the  
171 membrane (Fig. 4B). Thus, the unwound part of TM4 (<sup>356</sup>PVSM motif), which has been

172 implicated in the lipid transport<sup>27</sup>, is exposed to the hydrophobic bulk lipid. Comparison  
173 with other flippase structures in the corresponding reaction state reveals that the crevice  
174 in ATP11C is wider than that in Drs2p activated form<sup>34</sup> (Fig. S6). In the ATP8A1 E2P  
175 state, a membrane crevice is not formed at all<sup>31</sup>, probably due to its longer C-terminal  
176 regulatory domain compared with that in ATP11C (~38 amino acids)<sup>38</sup> (Fig. S4). The  
177 exoplasmic side of the crevice is closed in the PtdSer-occluded E2-P<sub>i</sub> transition state of  
178 ATP8A1, and clearly different from that in the ATP11C E2P state (Fig. S6). In ATP11C,  
179 TM2 is kinked at Pro94, an amino acid residue conserved in all mammalian P4-ATPases  
180 (Fig. 2B, Fig. S6), so that the exoplasmic side of TM2 departs from the central axis of  
181 the crevice in this region. This structural feature enables the formation of the wide and  
182 continuous crevice from the exoplasmic side to the PtdSer occlusion site near the  
183 unwound part of TM4. Substitution of Pro94 for alanine significantly reduces apparent  
184 affinities for both PtdSer and PtdEtn (Fig. 2C), indicating that the TM2 kink is key for  
185 developing a crevice structure that is wide enough for passage of a phospholipid head  
186 group. We conclude that the observed longitudinal crevice is in fact the outward facing  
187 conduit that enables the phospholipid translocation.

188 Well-ordered crystals were generated in the presence of both BeF<sub>x</sub> and DOPS.  
189 The thermal stability<sup>39</sup> of the purified ATP11C-CDC50A complex in the presence of  
190 both BeF<sub>x</sub> and PtdSer ( $T_m = 53.5^\circ\text{C}$ ) is markedly higher than those in the absence ( $T_m =$   
191  $33.6^\circ\text{C}$ ), or presence of either BeF<sub>x</sub> ( $T_m = 41.3^\circ\text{C}$ ) or PtdSer alone ( $T_m = 46.4^\circ\text{C}$ ) (Fig.  
192 2D), indicating that the BeF<sub>x</sub>-bound form binds PtdSer, and the enzyme is likely  
193 accumulates in a distinct PtdSer-bound, but not occluded, E2P form in the crystal. This  
194 conclusion is supported by the fact that an excess of PtdSer is required for preservation  
195 of the crystals when harvested for X-ray diffraction studies (Methods), indicating that  
196 PtdSer dissociates from the binding site at low to zero concentration. In fact, the  
197 electron densities found in the crystal structure (Fig. 1C, Fig. 3) led us to model two  
198 PtdSer molecules in the structure.

199

### 200 **PtdSer binding at the exoplasmic cavity**

201 There is a cavity at the exoplasmic side of the conduit (Fig. 3), which is formed  
202 by the TM3-4 loop of ATP11C and the exoplasmic domain of CDC50A around the  
203 surface of the membrane outer leaflet. This cavity is connected to the crevice observed  
204 in the TM region (Fig. 3, Fig. S6). Unexpectedly, the omit map showed an extra density  
205 at this position, and one PtdSer can be modeled here (Fig. 3C). The head group of the  
206 PtdSer is accommodated deep in the cavity, the surface of which is highly hydrophilic  
207 and electro-positive because of the many basic amino acids from both ATP11C and

208 CDC50A arranged here (Fig. 3AB, Fig. S4). A cluster of basic amino acids is also  
209 observed in the cryo-EM structure of ATP8A1<sup>31</sup>. This positively-charged, and  
210 hydrophilic binding cavity would be favorable for attracting the negatively-charged  
211 phosphate group of a phospholipids. The hydrocarbon tails of the bound PtdSer lie  
212 along the membrane plane, projecting towards the membrane lipid phase. Single  
213 replacements of the positively-charged amino acids located at the entrance of the cavity  
214 produced only moderate effects on PtdSer- or PtdEtn-dependent ATPase activities,  
215 probably due to the number of remaining basic amino acids. This interpretation is  
216 supported by the approximately 50% reduction in the  $V_{\max}$  of the triple mutant  
217 (Arg132Ala<sup>CDC</sup>/ Arg133Ala<sup>CDC</sup>/ Lys136Ala<sup>CDC</sup>) relative to that of wild-type (Fig. 3D).  
218 Beside these positively-charged amino acids, mutations in other hydrophilic amino  
219 acids in this cavity (Asn325Gln, Asp343Ala in ATP11C) produce a large reduction in  
220 apparent affinity for PtdEtn (Fig. 3E). Structural rigidity of the TM3-4 loop may also be  
221 important, because the apparent affinity for PtdEtn is also reduced in the alanine  
222 replacement of Trp323, which tethers the TM3-4 loop to the exoplasmic domain of  
223 CDC50A (Fig. 1D, Fig. 3C). These structural and functional data therefore suggest that  
224 this cavity is a priming site, responsible for the initial incorporation of phospholipids  
225 from the membrane outer leaflet – the beginning of the transport pathway.

226 The TM3-4 loop in ATP11C is 6 or 5 amino acid longer than that of ATP8A1  
227 and Drs2p, respectively, and less conserved compared with other parts of the protein  
228 (Fig. S4). However, the hydrophilic and electro-positive nature of this cavity is  
229 essentially the same, at least, for the three flippases whose structures have been  
230 determined. Interestingly, some of mutations in the exoplasmic cavity had differing  
231 effects on the apparent affinities for PtdSer and PtdEtn (Fig. 3D,E), suggesting that this  
232 region does indeed associates with the transport ligands. This observation is consistent  
233 with a previously reported chimeric study on yeast flippase Dnf1, in which amino acids  
234 in the TM3-4 loop are shown to contribute to the ligand specificity<sup>26</sup>.

235

### 236 **PtdSer occlusion site**

237 We also identified another PtdSer at the canonical occlusion site in the middle  
238 of the membrane (Fig 4), the position of which is close to that of PtdSer occluded in the  
239 ATP8A1 E2-P<sub>i</sub> transition state. We modeled only a part of PtdSer (phospho-L-serine  
240 moiety) at this position according to the observed electron density (Fig. 4A), the other  
241 part including its acyl chains are likely disordered in the bulk lipid phase. Like other  
242 flippases as well as cation-transporting P-type ATPases, the conserved proline (Pro356)  
243 in the PVSM sequence (corresponding to a PISL motif in most of the other P4-ATPases)



244 gives a characteristic unwinding at the middle of TM4, enabling the accommodation of  
245 a PtdSer head group at this position. The conduit ends at Val357 in the PVSM motif (Fig.  
246 4B), which has been implicated as a gating residue for the phospholipids against the  
247 cytoplasmic inner leaflet<sup>27</sup>, similar to the glutamate residue in the corresponding PEGGL  
248 motif of P2-type ATPases<sup>40,41</sup>. Hydrophobic residue of Val98 (corresponding to Ile115  
249 in ATP8A2) supports the gating residue Val357 on its cytoplasmic side, and these  
250 hydrophobic amino acids form a tight seal as a cytoplasmic gate, which prevents the  
251 penetration of the PtdSer head group to the cytoplasmic side in the outward-facing E2P  
252 state. In fact, mutation of these amino acids severely impaired PtdSer- or  
253 PtdEtn-dependent ATPase activity as well as PtdSer transport activity in the plasma  
254 membrane (Fig. 4C-E), consistent with previous predictions for other flippases<sup>26</sup>.  
255 Mutation in the hydrophilic amino acids located at the cytoplasmic side of TM1  
256 (Gln63Ala, Arg66Ala, Asn69Ala (corresponds to Asn220 in yeast flippase Dnf1)<sup>42</sup>) also  
257 showed reduced  $V_{\max}$  values for ATPase activity relative to wild-type. These amino  
258 acids may contribute to the rigidity of the cytoplasmic gate, or are actually part of the  
259 conduit for the inner leaflet when the cytoplasmic gate opens. Val357 in ATP11C  
260 corresponds to Ile357 in ATP8A1, Ile364 in ATP8A2 and Ile508 in Drs2p, thus of  
261 almost all the P4-ATPases only ATP11A and ATP11C have a valine residue in this  
262 position (methionine in ATP8B3). In the case of ATP11C, mutation Val357Ile produces  
263 a remarkable reduction in apparent affinity for PtdSer and PtdEtn, while  $V_{\max}$  is a bit  
264 higher than that of wild-type (Fig. 4C). In fact, the transport activity of Val357Ile is  
265 comparable to that of wild-type (Fig. 4E). In contrast, the ATPase activities of  
266 Val357Ala and Val357Phe, and the transport activity of Val357Phe are significantly  
267 reduced compared with those of wild-type. Evidently, correct size is important for  
268 gating residue Val357. Mutagenesis studies also reveal the important contribution of the  
269 conserved residues around the occlusion site (Phe72, Asn352) and TM5-6 (Lys880,  
270 Asn881 and Asn912), all alanine mutants showed significant reductions in either  $V_{\max}$  or  
271 apparent affinity for PtdSer and/or PtdEtn determined through ATPase activity profiles,  
272 and transport activities as well, in good agreement with previous studies of ATP8A2<sup>27,43</sup>.  
273 Interestingly, Phe343 is not conserved among P4-ATPases, despite its close position to  
274 the phospholipid head group. In other PtdSer-transporting P4-ATPases, including  
275 ATP8A1, ATP8A2 and Drs2p, Phe343 in ATP11C is replaced with asparagine (Fig. S4),  
276 and the hydrophilic residue actually contributes to PtdSer coordination in the ATP8A1  
277 E2-P<sub>i</sub> structure<sup>31</sup>. The Phe354Asn mutant in ATP11C showed significantly higher  
278 affinity for PtdSer and PtdEtn relative to wild-type while keeping its  $V_{\max}$  of ATPase  
279 activity and PtdSer transport activity comparable to wild-type level. Therefore, a

280 hydrophilic or smaller side chain in this position is favorable for the accommodation of  
281 the aminophospholipid head group in the occlusion site. It can be speculated that  
282 ATP11C has Val357 and Phe354 instead of the most conserved isoleucine and  
283 asparagine of other PtdSer-dependent flippases, to fine-tune the PtdSer and PtdEtn  
284 transport activity relevant to a plasma membrane flippase. As an important note,  
285 mutations Val98Ala, Phe72Ala, Asn881Ala and Asn912Ala increases the apparent  
286 affinity for PtdSer, but lower that for PtdEtn, relative to the wild-type (Fig. 4D),  
287 therefore these mutants were able to discriminate PtdSer and PtdEtn.

288

### 289 **A transport model**

290 Two PtdSer molecules bound to both ends of the conduit found in the crystal  
291 structure (Figs. 1,3 and 4) led us to put forward a transport model for the flippase, which  
292 is distinct from other models proposed so far<sup>26,27,44</sup> (Fig. 5). Translocation of the  
293 phospholipid, either PtdSer or PtdEtn is initiated by its binding to the positively-charged  
294 and hydrophilic cavity composed of the CDC50A exoplasmic domain and the ATP11C  
295 TM3-4 loop (Fig. 3, Fig. S7). The electro-positive and hydrophilic nature of the cavity  
296 likely attracts the head group of the phospholipid from the outer leaflet layer of the  
297 membrane. The exoplasmic cavity connects to the longitudinal crevice along TM4 (Fig.  
298 2, Fig. S6). Therefore, once the phospholipid head group is incorporated into the  
299 exoplasmic cavity, it may diffuse along the crevice while keeping its hydrocarbon  
300 chains projecting to the hydrophobic bulk lipid. Val349 in TM4 projects into the conduit  
301 (Fig. 4AB). Its replacement with bulky phenylalanine (Val349Phe) severely impairs  
302 PtdSer- and PtdEtn-dependent ATPase activity as well as PtdSer transport activity  
303 relative to wild-type, in contrast to the moderate effects of alanine substitution (Fig.  
304 4C-E). In addition, phenylalanine mutations of residues close to Val349 (Thr90Phe in  
305 TM2 and Leu350Phe in TM4) also significantly lowers ATPase activity relative to the  
306 wild-type. These amino acid residues are located between, and distant from, the two  
307 substrate binding sites and clearly bulky substitutions impede diffusion of the  
308 phospholipid head group from the exoplasmic cavity to the occlusion site. In the  
309 occlusion site, the phospholipid head group must be coordinated by conserved  
310 hydrophilic amino acids such as Asn352 and Asn881. The gating residue Val357 blocks  
311 further penetration of the phospholipid to the cytoplasmic inner leaflet. PtdSer binding  
312 to the occlusion site may be the signal to induce the conformational change required for  
313 reaching the PtdSer-occluded E2-P<sub>i</sub> transition state. Some of the hydrophilic amino  
314 acids in the TM1-2 loop may join in the coordination of the head group, as observed in  
315 the ATP8A1 E2-P<sub>i</sub> structure (Fig. S6)<sup>31</sup>. Movement of TM1-2, as a result of the loop

316 involvement, adjusts the A domain to induce dephosphorylation of E2P. Attainment of  
317 the E2 or E1 state, the next step, opens the cytoplasmic gate. A physical pathway from  
318 the occlusion site to the inner leaflet need to be opened. Mutation of amino acid  
319 residues around the cytoplasmic gate largely inhibited phospholipid dependent ATPase  
320 activity (Fig. 4). Movement of the TM1-2 helix bundle outwards may be needed for the  
321 phospholipid to move to the cytoplasmic inner leaflet, although this has not yet been  
322 elucidated.

323 Translocation of the phospholipid across the two leaflets is energetically  
324 extremely unfavorable due to the amphiphilic nature of phospholipids<sup>45</sup>, and the rate of  
325 spontaneous phospholipid flip-flop is order of several hour to several days. In our  
326 envisaged translocation mechanism, the most energy-consuming step may be moving  
327 the hydrophilic head group from the outer membrane surface to the transport conduit. In  
328 this step the phospholipid head group needs to disconnects from the polar interactions  
329 formed with neighboring phospholipids, surrounding membrane proteins as well as  
330 water molecules, and also needs to change its orientation approximately 90° from a  
331 vertical to horizontal orientation in the lipid bilayer. The structure and resulting  
332 transport model answer the fundamental question in the translocation mechanism of  
333 flippase -how phospholipid reaches the transport conduit from the outer leaflet. The  
334 hydrophilic surface of the exoplasmic cavity interior provides an environment similar to  
335 the water-facing membrane surface and lowers the energetic barrier required for  
336 acquisition of the phospholipid head group. Many membrane transport proteins seem to  
337 employ a common strategy for the translocation of their specific substrates; the  
338 environment of the substrate binding site of the protein mimics that of the location from  
339 whence the substrate comes. Flippases are not an exception, and this strategy is applied  
340 in the most energy-consuming step in the sequence of the lipid flipping process by the  
341 ATP11C-CDC50A complex.

342

343 **Acknowledgement**

344 We thank M. Taniguchi for technical assistance, Dr. T. Nishizawa for sharing  
345 unpublished results of the ATP8A1 structure and Dr. D. McIntosh for improving the  
346 manuscript. This work was supported by Grants-in-Aid for the Scientific Research  
347 (17H03653), Basis for Supporting Innovative Drug Discovery and Life Science  
348 Research (BINDS) from Japan Agency for Medical Research and Development  
349 (AMED), Takeda Science Foundation (to K.A.); Core Research for Evolutional Science  
350 and Technology from JST (JPMJCR14M4, to S.N. and K.A.); Grants-in-Aid for  
351 Scientific Research (S), the Japan New Energy and Industrial Technology Development  
352 Organization (NEDO), and the Japan Agency for Medical Research and Development  
353 (AMED) (to Y.F.). This work is a part of a project (2018B2703 and 2019B2707) at  
354 SPring-8. This research is partly supported by the Platform Project for Supporting Drug  
355 Discovery and Life Science Research (BINDS) from AMED under Grant number  
356 JP18am0101070.

357

358 **Author Contributions** Y.F., S.N. and K.A. designed the study. H.N. and K.A. were  
359 responsible for protein expression. H.N. purified and crystallized the protein. H.N. K.S.  
360 and K.A. performed biochemical analysis. H.N., K.H. and K.A. collected X-ray  
361 diffraction data. K.H. merged X-ray diffraction data. K.I. and K.A. analyzed the  
362 structure. K.I. and K.A. interpreted the structure. H.N. K.S. and K.A. wrote the  
363 manuscript with agreement of all authors.

364

365 **Author Information**

366 Atomic coordination and structure factors for the structures reported in this work have  
367 been deposited in the Protein Data Bank under accession number NXXX.  
368 Correspondence and requests for materials should be addressed to K.A.  
369 (kabe@cespi.nagoya-u.ac.jp).

370

371 **Materials and Methods**

372 **Protein expression and purification**

373 Human *ATP11C* (NCBI: XM\_005262405.1)<sup>4</sup> was sub-cloned into a hand-made  
374 vector as described previously<sup>13</sup>. Both of the amino terminal 7 amino acids ( $\Delta$ N7) and  
375 the carboxyl terminal 38 amino acids ( $\Delta$ C38) of hATP11C were truncated, and the Flag  
376 epitope tag (DYKDDDDK), hexa-histidine tag, the enhanced green fluorescence protein  
377 (EGFP) followed by a tobacco etch virus (TEV) protease recognition sequence were  
378 attached to the amino terminal of the deletion mutant (ATP11C\_cryst). Human *CDC50A*

379 cDNA (NCBI: NM\_018247.3) was sub-cloned into the vector independently. The  
380 Asn190Gln and Ser292Trp double mutation was introduced into the construct to  
381 regulate its glycosylation status (CDC50A\_QW). The former mutation is simply aimed  
382 to prevent *N*-linked glycosylation. The latter is to eliminate *O*-linked glycosylation at  
383 Ser292 and at the same time to increase the efficiency of *N*-linked glycosylation at  
384 Asn294<sup>48</sup>, because these residues appeared to be glycosylated alternatively. The  
385 heterodimer composed of ATP11C\_cryst and CDC50A\_QW was successfully expressed  
386 in the plasma membrane using baculovirus-mediated transduction of mammalian  
387 Expi293 cells (Thermo) for 48 h at 31.5 °C as described previously<sup>28,46</sup>. The harvested  
388 cells were directly solubilized with 1.5 % (w/v) *n*-decyl  $\beta$ -D-maltoside in a lysis buffer  
389 containing 40 mM MES/Tris (pH 6.5), 200 mM NaCl, 2 mM Mg(CH<sub>3</sub>COO)<sub>2</sub>, 1 mM  
390 ATP, 1 mM dithiothreitol, 0.1 mM ethylene  
391 glycol-bis(2-aminoethylether)-*N,N,N',N'*-tetraacetic acid (EGTA) and protease inhibitor  
392 cocktail (Roche) on ice for 20 min. After removing the insoluble material by  
393 ultracentrifugation (200,000×g for 1h), the supernatant was mixed with anti-Flag M2  
394 affinity resin (Sigma-Aldrich) for 1 h at 4 °C. The resin was washed with 20 column  
395 volumes of buffer consisting of 20 mM MES/Tris (pH 6.5), 200 mM NaCl, 5% (v/v)  
396 glycerol, 1 mM Mg(CH<sub>3</sub>COO)<sub>2</sub>, 0.1 mM ATP, 0.1 mM EGTA and 0.03% octaethylene  
397 glycol monododecyl ether (C<sub>12</sub>E<sub>8</sub>, Nikko Chemical). Flag-EGFP tagged ATP11C was  
398 eluted with 0.2 mg/ml Flag peptide (Sigma-Aldrich) in the wash buffer. Eluted proteins  
399 were incubated with TEV protease and MBP-fusion endoglycosidase (EndoHf, New  
400 England Biolabs) at 4 °C overnight. Released affinity tags containing Flag-EGFP were  
401 removed from the mixture by a Ni-NTA resin (QIAGEN). The non-absorbed fractions  
402 were concentrated and subjected to a size-exclusion column chromatograph using a  
403 Superose6 Increase column (GE Healthcare), equilibrated in a buffer comprising 20 mM  
404 MES/Tris (pH 6.5), 1%(v/v) glycerol, 50 mM NaCl, 5 mM MgCl<sub>2</sub>, and 0.03% C<sub>12</sub>E<sub>8</sub>.  
405 Peak fractions were collected and concentrated to 10 mg/ml. See Fig. S1 for the purity  
406 of the sample at each step. The concentrated ATP11C samples were mixed with 1 mM  
407 ADP, 0.5 mM BeSO<sub>4</sub>, 1.5 mM NaF, and 0.1 mg/ml dioleoyl phosphatidylserine (DOPS),  
408 and added to the glass tubes in which a layer of dried dioleoyl phosphatidylcholine  
409 (DOPC) had formed, in a lipid-to-protein ratio of 0.2. C<sub>12</sub>E<sub>8</sub> was added to the glass  
410 tubes in a protein-to-detergent ratio of 0.5 to 2.0, and the mixture was incubated  
411 overnight at 4 °C in a shaker mixer operated at 120 rpm<sup>29</sup>. After removing the insoluble  
412 material by ultracentrifugation, lipidated samples were subjected to crystallisation. Note  
413 that the effect of truncation of the both terminal amino acids of ATP11C, the double  
414 mutation introduced to CDC50A and deglycosylation of CDC50A on the PtdSer- and

415 PtdEtn-dependent ATPase activity were negligible compared with wild-type without  
416 endoglycosidase treatment.

417

#### 418 **Gene editing for CDC50A**

419 The CRISPR (Clustered Regularly Interspaced Short Palindromic Repeats)-Cas  
420 (CRISPR-associated) system with pX330 vector (Addgene) was used to edit the  
421 CDC50A gene in HEK293S GnT1- cells as described<sup>4</sup>. The sgRNA sequences for  
422 human CDC50A were as follows; 5'-CACCGGGCAACGTGTTTATGTATTA-3' and  
423 5'-AAACTAATACATAAACACGTTGCC-3'. Target protospacer sequences are  
424 underlined.

425

#### 426 **Crystallization and data collection**

427 Crystals were obtained by vapour diffusion at 20°C. The lipidated 10 mg/ml protein  
428 sample obtained either from Expi293 cell or CDC-KO cells, containing 1 mM ADP, 0.5  
429 mM BeSO<sub>4</sub>, 1.5 mM NaF, and 0.1 mg/ml DOPS was mixed with reservoir solution  
430 containing 10% (v/v) glycerol, 14-17% PEG4000, 0.4 M MgSO<sub>4</sub>, and 2 to 5 mM  
431 β-mercaptoethanol. Crystals made using protein samples purified from Expi293 cells  
432 grew in a thin plate-like shape with the dimensions of 800 × 500 × 50 μm in 2 weeks. In  
433 contrast, crystals from CDC-KO cells grew as small crystals usually less than 50 μm  
434 with a polyhedron shape. These crystals were picked up with LithoLoops (Protein Wave  
435 Corporation), and flash frozen in liquid nitrogen. The crystals were harvested in the  
436 presence of 10% (v/v) glycerol, 14-17% PEG4000, 0.4 M MgSO<sub>4</sub>, 4 mg/ml DOPS, 20  
437 mM MES/Tris (pH 6.5), 50 mM NaCl, 5 mM MgCl<sub>2</sub>, 5 mM β-mercaptoethanol, 2%  
438 C<sub>12</sub>E<sub>8</sub>, 1 mM ADP, 0.5 mM BeSO<sub>4</sub> and 1.5 mM NaF. Note, when crystals were  
439 harvested in the absence of DOPS, a few percent approximately of crystals gave X-ray  
440 diffraction better than 4Å. In the presence of 4 mg/ml DOPS, however, the number of  
441 well-diffracting crystals mostly increased to approximately 30% of all harvested crystals.  
442 Despite the different crystal morphologies of the crystals obtained from Expi293 cells  
443 and CDC50A KO cells (Fig. S1), the crystals show the same space group (*P*2<sub>1</sub>2<sub>1</sub>2<sub>1</sub>) and  
444 unit cell size (*a* = 100.5Å, *b* = 232.8Å, *c* = 492.9 Å,  $\alpha = \beta = \gamma = 90^\circ$ ).

445 X-ray diffraction data were collected at the SPring-8 beamline BL32XU, BL41XU and  
446 BL45XU. For the large plate-like crystals obtained from Expi293 cells, X-ray  
447 diffraction data were collected by helical scan method<sup>49</sup>, or by irradiating micro-focus  
448 beam from the direction perpendicular to the *c*-axis by monitoring crystals on 90° bent  
449 LithoLoop (Fig. S1). Crystals from CDC-KO cells were too small to collect full data set  
450 from each crystal, and well-diffracted crystal could not be determined from its

451 morphology. Therefore, multiple crystals were mounted on a  $\phi 1$   $\mu\text{m}$  LithoLoop, and the  
452 raster scan was performed to identify well-diffracted crystals. After selecting target  
453 crystals,  $10^\circ$  small-wedge data were collected from each individual crystal (Fig. S1).  
454 Total 1,588 crystals were used for the data collection and some of them were performed  
455 automatic manner by using ZOO system<sup>50</sup>.

456

#### 457 **Structural determination and analysis**

458 All the diffraction data from individual 1,588 well-diffracting crystals were processed  
459 and merged using automatic data processing system KAMO<sup>47</sup> with XDS<sup>51</sup>. Structure  
460 factors were subjected to anisotropy correction using the UCLA MBI Diffraction  
461 Anisotropy server<sup>52</sup> (<http://services.mbi.ucla.edu/anisotropy/>). The structure was  
462 determined by molecular replacement with PHASER, using a homology model based  
463 on the cryo-EM structure of the E2P state of ATP8A1 (PDB ID: 6K7L) as a search  
464 model. Cool<sup>53</sup> was used for cycles of iterative model building and Refmac<sup>54</sup> and  
465 Phenix<sup>55</sup> were used for refinement. The final crystallographic model of BeF<sub>x</sub>-bound  
466 human ATP11C at a 3.8Å resolution, refined to  $R_{\text{work}}$  and  $R_{\text{free}}$  of 0.29 and 0.36 was  
467 deposited in the PDB with accession code PDB: 6LKN. Figures were prepared using  
468 UCSF Chimera<sup>56</sup> and PYMOL (<https://pymol.org>).

469

#### 470 **Activity assay using recombinant proteins**

471 To measure the ATPase activity, Flag-EGFP tag connected by the TEV cleavage site to  
472 the N-terminal tail of ATP11C\_cryst was used to estimate its expression level by  
473 fluorescence size-exclusion column chromatography (FSEC)<sup>57</sup>. The original and  
474 additional mutant complexes of ATP11C\_cryst and the CDC50A\_QW were expressed  
475 using the BacMam system and purified in a smaller batch format as described above  
476 except for TEV protease digestion and endoglycosidase treatment. The purified proteins  
477 (the purity of samples used for the ATPase measurement was comparable to lane 4 of  
478 SDS-PAGE in Fig. S1) were subjected to an ATPase activity assay as described  
479 previously<sup>58</sup>. Briefly, partially purified ATP11C (wild-type or mutants) was suspended  
480 in buffer comprising 40 mM HEPES, 2 mM MgCl<sub>2</sub>, 2 mM ATP, 2% glycerol, 100 mM  
481 NaCl, 0.03 mg/ml C<sub>12</sub>E<sub>8</sub> (pH 7.0 adjusted by Tris) and indicated concentrations of  
482 phospholipids (DOPS or POPE, dissolved as 10 mg/ml stock in 2% C<sub>12</sub>E<sub>8</sub>), in 96-well  
483 plates. Reactions were initiated by incubating the samples at 37 °C using a thermal  
484 cycler, and maintained for 1h. Reactions were terminated, and the amount of released  
485 inorganic phosphate was determined colorimetrically using a microplate reader  
486 (TECAN). Samples used for the ATPase measurement were analyzed by FSEC with

487 monitoring with Trp fluorescence (Ex 280 nm, Em 320 nm) monitoring, and peak  
488 fluorescence values were determined. The peak values of samples were compared to  
489 that of a fully purified sample used for the crystallization whose protein concentration  
490 was accurately determined by UV absorption, and protein concentrations for each  
491 measured sample were estimated. The phospholipid concentration-dependent ATPase  
492 activities were plotted, and data fitted as described previously<sup>43</sup> to estimate apparent  
493 affinities ( $K_{0.5}$ ) and  $V_{max}$  using PRISM4 software. For all measurements, data were  
494 duplicated at twelve different phospholipid concentrations for a single measurement,  
495 and at least three independent measurements were conducted for each mutant. The  $K_{0.5}$   
496 and  $V_{max}$  values plotted in Fig. 3 and 4 are mean and S.D.s estimated from at least three  
497 independent measurements, and representative ones are shown in Fig. S5. Note, the  
498 PtdSer- or PtdEtn-dependent specific ATPase activities of ATP11C\_cryst-CDC50A\_QW  
499 complex were almost the same as those of wild-type. We therefore refer to  
500 ATP11C\_cryst-CDC50A\_QW as wild-type in the activity assay for simplicity.

501

#### 502 **Flippase assay**

503 Flippase activity was determined as described<sup>59</sup>. In brief, *ATP11A-ATP11C*  
504 double-deficient WR19L mutant (*DKO*) cells were transformed with retroviruses  
505 carrying cDNA for human FLAG-tagged CDC50A and EGFP-tagged wild-type ATP11C  
506 or mutants. The stable transformants were then subjected to cell sorting for EGFP with  
507 FACSARIAII (BD Biosciences), cells at the same EGFP-intensity were sorted, and  
508 expanded. Amounts of EGFP-tagged proteins and their localization to the plasma  
509 membrane were verified by Western blotting and a confocal microscope (FV-1000D;  
510 Olympus), respectively. For the flippase assay, *DKO* cells and its transformants  
511 expressing wild-type ATP11C or mutants were incubated with 1  $\mu$ M NBD-PS  
512 (1-oleoyl-2-{6-[(7-nitro-2-1,3-benzoxadiazol-4-yl)amino]hexanoyl}-*sn*-glycero-3-phosp  
513 hoserine for 3 min at 20 °C in Hanks' balanced salt solution (HBSS) containing 1 mM  
514 MgCl<sub>2</sub> and 2 mM CaCl<sub>2</sub>. The cells were collected by centrifugation, resuspended in  
515 HBSS containing 5 mg/ml fatty acid-free BSA to extract nonincorporated lipids, and  
516 analyzed by FACSCanto II (BD Biosciences).

517

#### 518 **Thermal stability**

519 Purified samples were incubated at the indicated temperatures for 10 min in the  
520 presence of 40 mM HEPES, 100 mM NaCl, 2 mM MgCl<sub>2</sub> (free) with 1 mM BeSO<sub>4</sub>, 3  
521 mM NaF (BeF) and/or 0.1 mg/ml DOPS (PtdSer). After incubation, samples were  
522 cooled on ice and denatured aggregates removed using a membrane filter (pore size 0.22



523  $\mu\text{m}$ ), and the resulting filtrates were analyzed by size-exclusion column chromatography  
524 using Superose 6 Increase 10/150 GL (GE healthcare). Peak values at the retention time  
525 for the complex were plotted as a function of incubation temperature, and their  $T_m$   
526 values estimated.  
527  
528

529 **References**

- 530 1. Leventis, P. A. & Grinstein, S. The Distribution and Function of  
531 Phosphatidylserine in Cellular Membranes. *Annu. Rev. Biophys.* **39**, 407–427  
532 (2010).
- 533 2. Pomorski, T. & Menon, A. K. Lipid flippases and their biological functions.  
534 *Cellular and Molecular Life Sciences* **63**, 2908–2921 (2006).
- 535 3. Segawa, K. & Nagata, S. An Apoptotic ‘Eat Me’ Signal: Phosphatidylserine  
536 Exposure. *Trends Cell Biol.* **25**, 639–650 (2015).
- 537 4. Segawa, K. *et al.* Caspase-mediated cleavage of phospholipid flippase for  
538 apoptotic phosphatidylserine exposure. *Science (80-. )*. **344**, 1164–1168 (2014).
- 539 5. Bevers, E. M. *et al.* The complex of phosphatidylinositol 4,5-bisphosphate and  
540 calcium ions is not responsible for Ca<sup>2+</sup>-induced loss of phospholipid asymmetry  
541 in the human erythrocyte: A study in Scott syndrome, a disorder of  
542 calcium-induced phospholipid scrambling. *Blood* **86**, 1983–1991 (1995).
- 543 6. Williamson, P. Phospholipid Scramblases Supplementary Issue: Cellular  
544 Anatomy of Lipid Traffic. 41–44 doi:10.4137/Lpi.s31785
- 545 7. Tang, X., Halleck, M. S., Schlegel, R. A. & Williamson, P. A subfamily of  
546 P-type ATPases with aminophospholipid transporting activity. *Science (80-. )*.  
547 **272**, 1495–1497 (1996).
- 548 8. Coleman, J. A., Kwok, M. C. M. & Molday, R. S. Localization, purification, and  
549 functional reconstitution of the P4-ATPase Atp8a2, a phosphatidylserine Flippase  
550 in photoreceptor disc membranes. *J. Biol. Chem.* **284**, 32670–32679 (2009).
- 551 9. Shin, H.-W. & Takatsu, H. Substrates of P4-ATPases: beyond  
552 aminophospholipids (phosphatidylserine and phosphatidylethanolamine). *FASEB*  
553 *J.* **33**, 3087–3096 (2019).
- 554 10. Palmgren, M. G. & Axelsen, K. B. Evolution of P-type ATPases. *Biochim.*  
555 *Biophys. Acta* **1365**, 37–45 (1998).
- 556 11. Toyoshima, C., Nakasako, M., Nomura, H. & Ogawa, H. Crystal structure of the  
557 calcium pump of sarcoplasmic reticulum  $\hat{E}$  resolution. *Nature* **405**, 647–655  
558 (2000).
- 559 12. Morth, J. P. *et al.* Crystal structure of the sodium–potassium pump. *Nature* **450**,  
560 1043–1049 (2007).
- 561 13. Abe, K., Irie, K., Nakanishi, H., Suzuki, H. & Fujiyoshi, Y. Crystal structures of  
562 the gastric proton pump. *Nature* **556**, 214–229 (2018).
- 563 14. Andersen, J. P. *et al.* P4-ATPases as phospholipid flippases-structure, function,  
564 and enigmas. *Front. Physiol.* **7**, 1–23 (2016).

- 565 15. Saito, K. *et al.* Cdc50p, a protein required for polarized growth, associates with  
566 the Drs2p P-type ATPase implicated in phospholipid translocation in  
567 *Saccharomyces cerevisiae*. *Mol. Biol. Cell* **15**, 3418–3432 (2004).
- 568 16. Bryde, S. *et al.* CDC50 proteins are critical components of the human class-1 P  
569 4-ATPase transport machinery. *J. Biol. Chem.* **285**, 40562–40572 (2010).
- 570 17. Segawa, K., Kurata, S. & Nagata, S. The CDC50A extracellular domain is  
571 required for forming a functional complex with and chaperoning phospholipid  
572 flippases to the plasma membrane. *J. Biol. Chem.* **293**, 2172–2182 (2018).
- 573 18. Segawa, K., Kurata, S. & Nagata, S. Human type IV P-type ATPases that work  
574 as plasma membrane phospholipid flippases and their regulation by caspase and  
575 calcium. *J. Biol. Chem.* **291**, 762–772 (2016).
- 576 19. Perez-Garcia, V. *et al.* Placentation defects are highly prevalent in embryonic  
577 lethal mouse mutants. (2018). doi:10.1038/nature26002
- 578 20. Yabas, M. *et al.* ATP11C is critical for the internalization of phosphatidylserine  
579 and differentiation of B lymphocytes. *Nat. Immunol. Vol.* **12**, (2011).
- 580 21. Siggs, O. M. *et al.* The P4-type ATPase ATP11C is essential for B lymphopoiesis  
581 in adult bone marrow. *Nat. Immunol.* **12**, (2011).
- 582 22. Siggs, O. M., Schnabl, B., Webb, B. & Beutler, B. X-linked cholestasis in mouse  
583 due to mutations of the P4-ATPase ATP11C. doi:10.1073/pnas.1104631108
- 584 23. Yabas, M. *et al.* Mice Deficient in the Putative Phospholipid Flippase ATP11C  
585 Exhibit Altered Erythrocyte Shape, Anemia, and Reduced Erythrocyte Life Span  
586 \*. (2014). doi:10.1074/jbc.C114.570267
- 587 24. Arashiki, N. *et al.* ATP11C is a major flippase in human erythrocytes and its  
588 defect causes congenital hemolytic anemia. *Haematologica* **101**, 559–565 (2016).
- 589 25. Coleman, J. A., Vestergaard, A. L., Molday, R. S., Vilsen, B. & Andersen, J. P.  
590 Critical role of a transmembrane lysine in aminophospholipid transport by  
591 mammalian photoreceptor P4-ATPase ATP8A2. *Proc. Natl. Acad. Sci.* **109**,  
592 1449–1454 (2012).
- 593 26. Baldrige, R. D. & Graham, T. R. Two-gate mechanism for phospholipid  
594 selection and transport by type IV P-type ATPases. *Proc. Natl. Acad. Sci. U. S. A.*  
595 **110**, E358-67 (2013).
- 596 27. Vestergaard, A. L. *et al.* Critical roles of isoleucine-364 and adjacent residues in  
597 a hydrophobic gate control of phospholipid transport by the mammalian  
598 P4-ATPase ATP8A2. *Proc. Natl. Acad. Sci.* **111**, E1334–E1343 (2014).
- 599 28. Dukkupati, A., Park, H. H., Waghray, D., Fischer, S. & Garcia, K. C. BacMam  
600 system for high-level expression of recombinant soluble and membrane

- 601 glycoproteins for structural studies. *Protein Expr. Purif.* **62**, 160–170 (2008).
- 602 29. Gourdon, P. *et al.* HiLiDe-systematic approach to membrane protein  
603 crystallization in lipid and detergent. *Crystal Growth and Design* **11**, 2098–2106  
604 (2011).
- 605 30. Danko, S., Yamasaki, K., Daiho, T., Suzuki, H. & Toyoshima, C. Organization of  
606 cytoplasmic domains of sarcoplasmic reticulum Ca<sup>2+</sup>-ATPase in E1P and  
607 E1ATP states: A limited proteolysis study. *FEBS Lett.* **505**, 129–135 (2001).
- 608 31. Hiraizumi, M., Yamashita, K., Nishizawa, T. & Nureki, O. Cryo-EM structures  
609 capture the transport cycle of the P4-ATPase flippase. *Science (80-. )*. **365**,  
610 1149–1155 (2019).
- 611 32. Norimatsu, Y., Hasegawa, K., Shimizu, N. & Toyoshima, C.  
612 Protein-phospholipid interplay revealed with crystals of a calcium pump. *Nature*  
613 **545**, 193–198 (2017).
- 614 33. Danko, S. *et al.* ADP-insensitive phosphoenzyme intermediate of sarcoplasmic  
615 reticulum Ca<sup>2+</sup>-ATPase has a compact conformation resistant to proteinase K,  
616 V8 protease and trypsin. *FEBS Lett.* **489**, 277–282 (2001).
- 617 34. Timcenko, M. *et al.* Structure and autoregulation of a P4-ATPase lipid flippase.  
618 *Nature* **571**, 366–370 (2019).
- 619 35. Katoh, K., Misawa, K., Kuma, K.-I. & Miyata, T. *MAFFT: a novel method for*  
620 *rapid multiple sequence alignment based on fast Fourier transform.*
- 621 36. Toyoshima, C., Norimatsu, Y., Iwasawa, S., Tsuda, T. & Ogawa, H. How  
622 processing of aspartylphosphate is coupled to luminal gating of the ion pathway  
623 in the calcium pump. *Proc. Natl. Acad. Sci.* **104**, 19831–19836 (2007).
- 624 37. MacKenzie, S. H. & Clark, A. C. Death by caspase dimerization. *Adv. Exp. Med.*  
625 *Biol.* **747**, 55–73 (2012).
- 626 38. Takatsu, H. *et al.* Phospholipid flippase ATP11C is endocytosed and  
627 downregulated following Ca<sup>2+</sup>-mediated protein kinase C activation. *Nat.*  
628 *Commun.* **8**, (2017).
- 629 39. Hattori, M., Hibbs, R. E. & Gouaux, E. A fluorescence-detection size-exclusion  
630 chromatography-based thermostability assay for membrane protein  
631 precrystallization screening. *Structure* **20**, 1293–1299 (2012).
- 632 40. Inesi, G., Lewis, D., Toyoshima, C., Hirata, A. & De Meis, L. Conformational  
633 fluctuations of the Ca<sup>2+</sup>-ATPase in the native membrane environment: Effects of  
634 pH, temperature, catalytic substrates, and thapsigargin. *J. Biol. Chem.* **283**,  
635 1189–1196 (2008).
- 636 41. Tsunekawa, N., Ogawa, H., Tsueda, J., Akiba, T. & Toyoshima, C. Mechanism

- 637 of the E2 to E1 transition in Ca<sup>2+</sup> pump revealed by crystal structures of gating  
638 residue mutants [Biochemistry]. *Proc. Natl. Acad. Sci. U. S. A.* **115**, 2–7 (2018).
- 639 42. Roland, B. P. & Graham, T. R. Directed evolution of a sphingomyelin flippase  
640 reveals mechanism of substrate backbone discrimination by a P4-ATPase. *Proc.*  
641 *Natl. Acad. Sci.* **113**, E4460–E4466 (2016).
- 642 43. Mikkelsen, S. A. *et al.* Asparagine 905 of the mammalian phospholipid flippase  
643 ATP8A2 is essential for lipid substrate–induced activation of ATP8A2  
644 dephosphorylation. *J. Biol. Chem.* **294**, 5970–5979 (2019).
- 645 44. Jensen, M. S. *et al.* Phospholipid flipping involves a central cavity in P4 ATPases  
646 OPEN. doi:10.1038/s41598-017-17742-y
- 647 45. Pomorski, T. G. & Menon, A. K. Lipid somersaults: Uncovering the mechanisms  
648 of protein-mediated lipid flipping. *Progress in Lipid Research* (2016).  
649 doi:10.1016/j.plipres.2016.08.003
- 650 46. Goehring, A. *et al.* Screening and large-scale expression of membrane proteins in  
651 mammalian cells for structural studies. *Nat. Protoc.* **9**, 2574–2585 (2014).
- 652 47. Yamashita, K., Hirata, K. & Yamamoto, M. KAMO: towards automated data  
653 processing for microcrystals. *Acta Crystallogr. Sect. D Struct. Biol.* **74**, 441–449  
654 (2018).
- 655 48. Murray, A. N. *et al.* Enhanced Aromatic Sequons Increase  
656 Oligosaccharyltransferase Glycosylation Efficiency and Glycan Homogeneity.  
657 *Chem. Biol.* (2015). doi:10.1016/j.chembiol.2015.06.017
- 658 49. Flot, D. *et al.* The ID23-2 structural biology microfocus beamline at the ESRF. *J.*  
659 *Synchrotron Radiat.* **17**, 107–118 (2010).
- 660 50. Hirata, K. *et al.* Zoo: An automatic data-collection system for high-throughput  
661 structure analysis in protein microcrystallography. *Acta Crystallogr. Sect. D*  
662 *Struct. Biol.* **75**, 138–150 (2019).
- 663 51. Kabsch, W. *et al.* XDS. *Acta Crystallogr. Sect. D Biol. Crystallogr.* **66**, 125–132  
664 (2010).
- 665 52. Strong, M. *et al.* Toward the structural genomics of complexes: crystal structure  
666 of a PE/PPE protein complex from Mycobacterium tuberculosis. *Proc. Natl.*  
667 *Acad. Sci. U. S. A.* **103**, 8060–5 (2006).
- 668 53. Emsley, P. *et al.* Coot: model-building tools for molecular graphics. *Acta*  
669 *Crystallogr. Sect. D Biol. Crystallogr.* **60**, 2126–2132 (2004).
- 670 54. Murshudov, G. N. *et al.* REFMAC5 for the refinement of macromolecular crystal  
671 structures. *Acta Crystallogr. Sect. D Biol. Crystallogr.* **67**, 355–367 (2011).
- 672 55. Adams, P. D. *et al.* PHENIX: a comprehensive Python-based system for

- 673 macromolecular structure solution. *Acta Crystallogr. D. Biol. Crystallogr.* **66**,  
674 213–21 (2010).
- 675 56. Pettersen, E. F. *et al.* UCSF Chimera- A visualization system for exploratory  
676 research and analysis. *J. Comput. Chem.* **25**, 1605–1612 (2004).
- 677 57. Kawate, T. & Gouaux, E. Fluorescence-Detection Size-Exclusion  
678 Chromatography for Precrystallization Screening of Integral Membrane Proteins.  
679 *Structure* **14**, 673–681 (2006).
- 680 58. Yamamoto, K. *et al.* A single K<sup>+</sup>-binding site in the crystal structure of the  
681 gastric proton pump. *eLife* **8**, (2019).
- 682 59. Segawa, K. *et al.* Phospholipid flippases enable precursor B cells to flee  
683 engulfment by macrophages. doi:10.1073/pnas.1814323115  
684

685 **Figures**

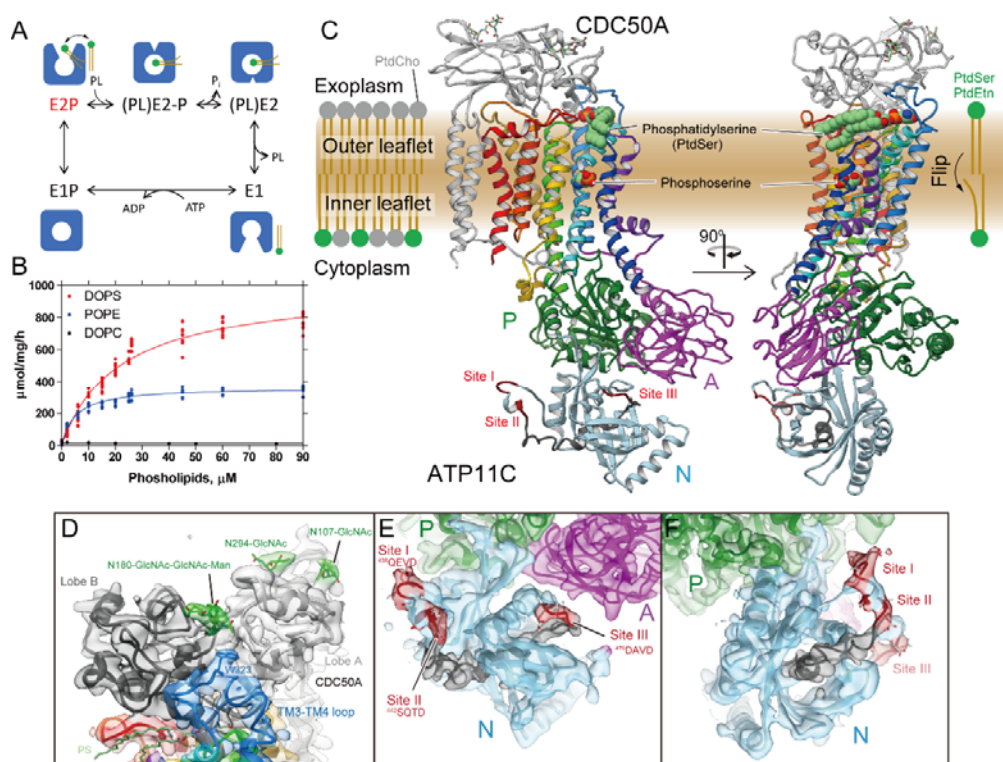

686  
 687 Fig. 1. Crystal structure of ATP11C-CDC50A complex.  
 688 (A) Reaction scheme of phospholipid (PL) translocation coupled with ATP-hydrolysis.  
 689 Cartoons represent molecular conformations of ATP11C-CDC50A complex (inward- or  
 690 outward-, and open or occluded states). (B) PL-dependent ATPase activity by the purified  
 691 ATP11C-CDC50A complex. Specific ATPase activities in the presence of  
 692 DOPS (red), POPE (blue) or DOPC (black) were plotted as a function of their  
 693 concentrations. DOPS gave the highest ATPase activity, POPE showed intermediate,  
 694 while there was no detectable ATPase activity in the presence of DOPC. (C) Overall  
 695 structure of the outward-open E2P state of ATP11C-CDC50A complex in ribbon  
 696 representation. Color of the ATP11C gradually changes from the N-terminus (purple) to  
 697 the C-terminus (red). CDC50A subunit is shown in grey ribbon, and attached N-linked  
 698 glycans were displayed as green sticks. A DOPS molecule (PtdSer) and its hydrophilic  
 699 phosphoserine part are shown as spheres in the exoplasmic cavity and the occlusion site  
 700 in the middle of the TM domain, respectively. Three cytoplasmic domains are indicated  
 701 with different colors, and caspase recognition sequences at the N domain surface are  
 702 indicated in red. Gray ribbon in the N domain thus indicates the region that is removed  
 703 after the caspase cleavage. (D) Closed view of the exoplasmic region of CDC50A  
 704 subunit. Surface represents electron density map (1.5σ). Lobe A (light grey) and lobe B  
 705 (dark grey) are shown in different colors, and TM3-4 loop is shown in blue with Trp323  
 706 side chain fitted into the map. N-linked glycans (green) are highlighted. (E,F) Close-up  
 707 of the N domain (light blue) from two different viewpoints. Surface shows electron  
 708 density map at 1.0σ contour level. Three caspase recognition sites (I, II and III) and the  
 709 region in between them (Gly466-Asn477) are indicated in red and grey, respectively.

710

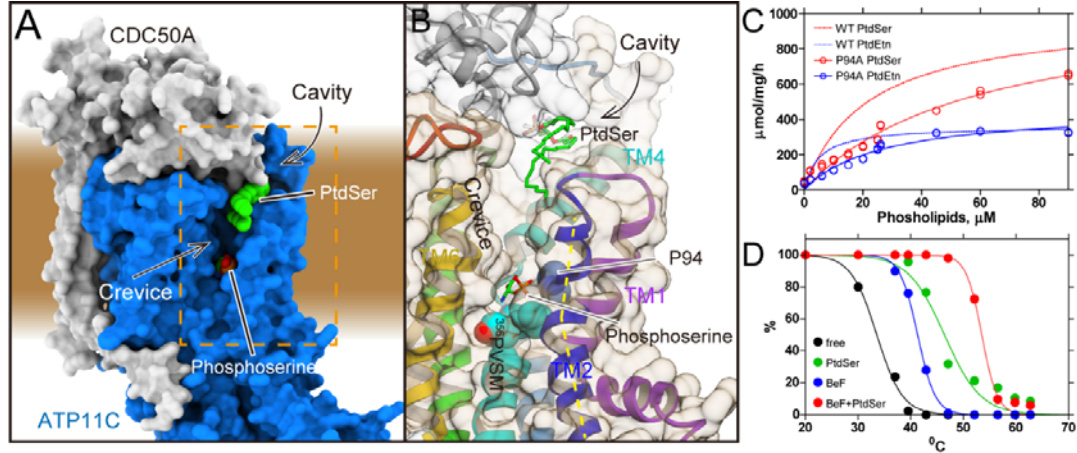

711

712

713 Fig. 2. The crevice in the TM region.

714 (A) Surface representation of the ATP11C-CDC50A complex shows the crevice in the  
715 TM region. Green spheres with CPK coloring represent phosphoserine at the occlusion  
716 site in the crevice, and PtdSer bound to the exoplasmic cavity. Surfaces of the atomic  
717 model of ATP11C and CDC50A are shown in blue and grey, respectively. (B) Close-up  
718 view of the membrane crevice indicated as a dotted box in A. The crevice is mostly  
719 composed of TM2, TM4 and TM6. Pro94 makes a kink at the exoplasmic side of TM2  
720 (yellow dotted lines), which exposes the unwound region of TM4 (PVSM, shown in  
721 spheres) to the lipid bilayer phase. (C) PtdSer- or PtdEtn-dependent ATPase activities  
722 of wild-type (same as in Fig. 1) and Pro94Ala mutant as indicated in the figure. (D)  
723 Thermal stabilities of purified ATP11C-CDC50A complex determined by FSEC (see  
724 Methods). Peak values in the FSEC analysis were plotted as a function of treatment  
725 temperature in the absence (free) or presence of indicated substrates.

726



727

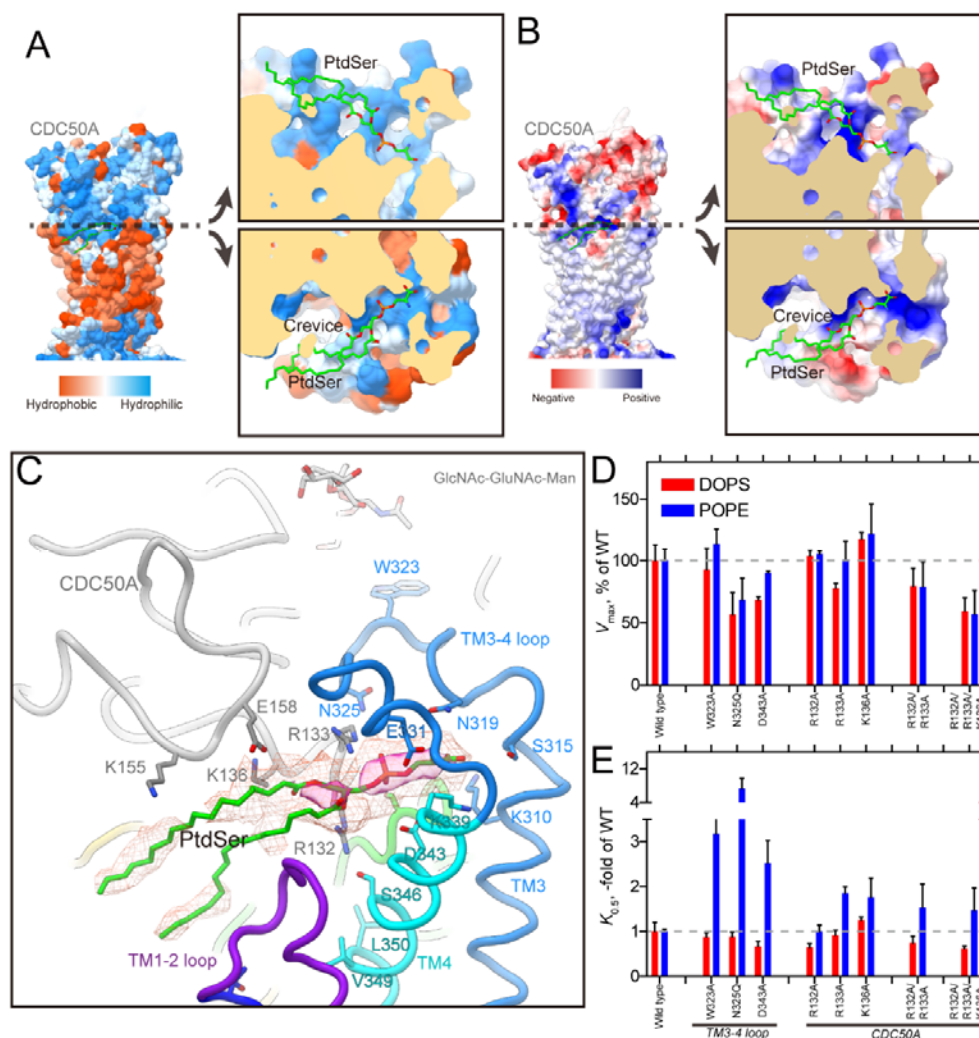

728

729

Fig. 3. Exoplasmic cavity

730

(A,B) Surface representations of the atomic model of ATP11C-CDC50A according to

731

their hydrophobicity (A) or Coulombic surface potentials (B). Each model was sliced at

732

the plane where the phosphate moiety of PtdSer is located, along with the membrane

733

plane, and opened up to show the surface of the exoplasmic cavity interior. Color codes

734

as indicated in the figures. (C) PtdSer binding cavity in detail. Some hydrophilic amino

735

acids surrounding PtdSer are shown as sticks. Color codes as in Fig. 1. Red mesh and

736

transparent red surface represent the 2Fo-Fc electron density maps around the PtdSer

737

molecule with contour levels of  $1.0\sigma$  and  $2.0\sigma$ , respectively. (D,E) The  $V_{max}$  and

738

apparent affinity for PtdSer or PtdEtn derived from the ATPase activities of indicated

739

mutants. The ATPase activity per mg of purified protein was determined and analyzed in

740

the presence of varying concentrations of PtdSer or PtdEtn (Representatives shown in

741

Fig. S7). The  $V_{max}$  is shown as a percentage of the wild-type value (D). The apparent

742

affinities for phospholipids are expressed as the concentration giving half-maximum

743

activation ( $K_{0.5}$ ), and plotted as x-fold of wild-type values (E).

744

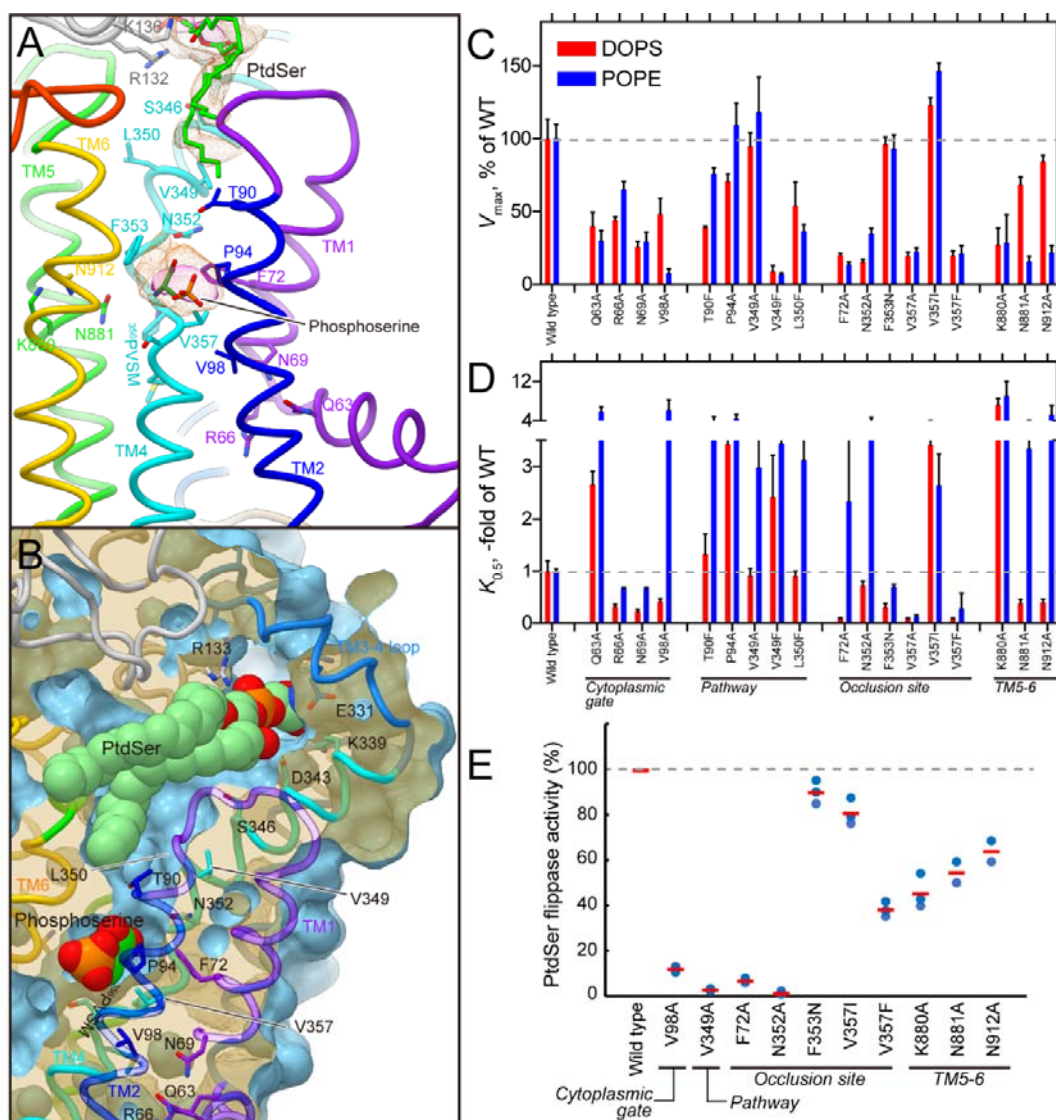

745  
 746 Fig. 4. Transmembrane PtdSer occlusion site  
 747 (A) PtdSer occlusion site in detail, viewed from perpendicular to the membrane plane.  
 748 Figure is displayed as in Fig. 3C. Phospho-L-serine (stick, green with CPK color) is  
 749 modeled according to the observed electron density. (B) Phospholipid conduit along  
 750 with TM4. Surface of the atomic model (light blue) is shown with superimposed ribbon  
 751 model. Only surface model is clipped by the different plane at the position where TM4  
 752 is located, so as to show how the conduit runs along TM4. Its clipped surface is seen as  
 753 transparent wheat color. Figure is drawn from TM1 and 2 viewpoint, with exoplasmic  
 754 side-up. (C,D)  $V_{max}$  and  $K_{0.5}$  for indicated mutants determined from their PtdSer- or  
 755 PtdEtn-dependent ATPase activities, as described in Fig. 3. (E) The PtdSer flippase  
 756 activity. *ATP11A-ATP11C* knock-out (*DKO*) T-lymphoma cells expressing wild-type  
 757 ATP11C or indicated mutants were incubated with 1  $\mu$ M NBD-PS for 3 min.  
 758 Experiments were performed two or three times, and flippase activity for NBD-PS is  
 759 shown as a percentage to that of wild-type ATP11C. Horizontal red bars denote  
 760 averages.

761

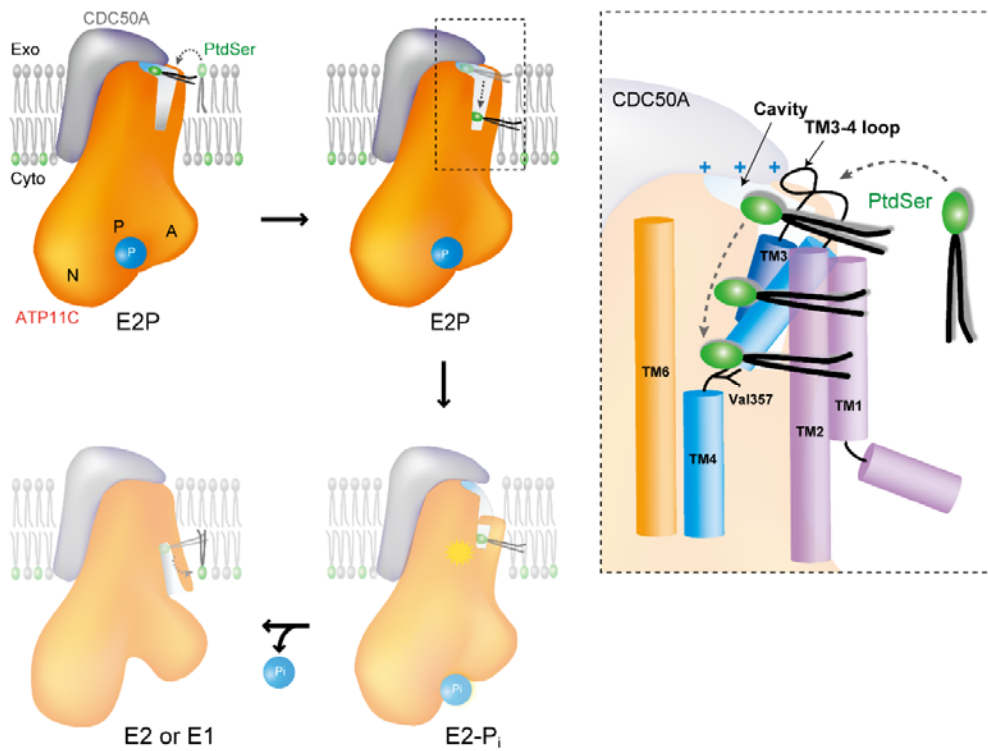

Fig. 5. A phospholipid transport model for ATP11C

(A) Schematic drawing of the transport mechanism by ATP11C-CDC50A complex. In the outward-open E2P state (present structure), phospholipid enters from the surface of outer leaflet to the exoplasmic cavity by changing its orientation (upper left). Trapped phospholipid head group diffuses along the membrane crevice with its hydrophobic tails extending out to the hydrophobic core of the bilayer (upper right). When the phospholipid head group reaches Val357 in the middle of the membrane, the phosphate head group is occluded by closing the crevice with the TM1-2 helix bundle (lower right). This process is coupled with dephosphorylation of E2P as seen in the ATP8A1 E2-P<sub>i</sub> transition state structure. Complete dephosphorylation may further open the cytoplasmic gate, and phospholipid is translocated to the cytoplasmic inner leaflet (lower left). (B) Close-up view of the membrane crevice indicated as dotted box in A. Phospholipid headgroup traverses from positively-charged exoplasmic cavity to the occlusion site near Val357 along with TM4.

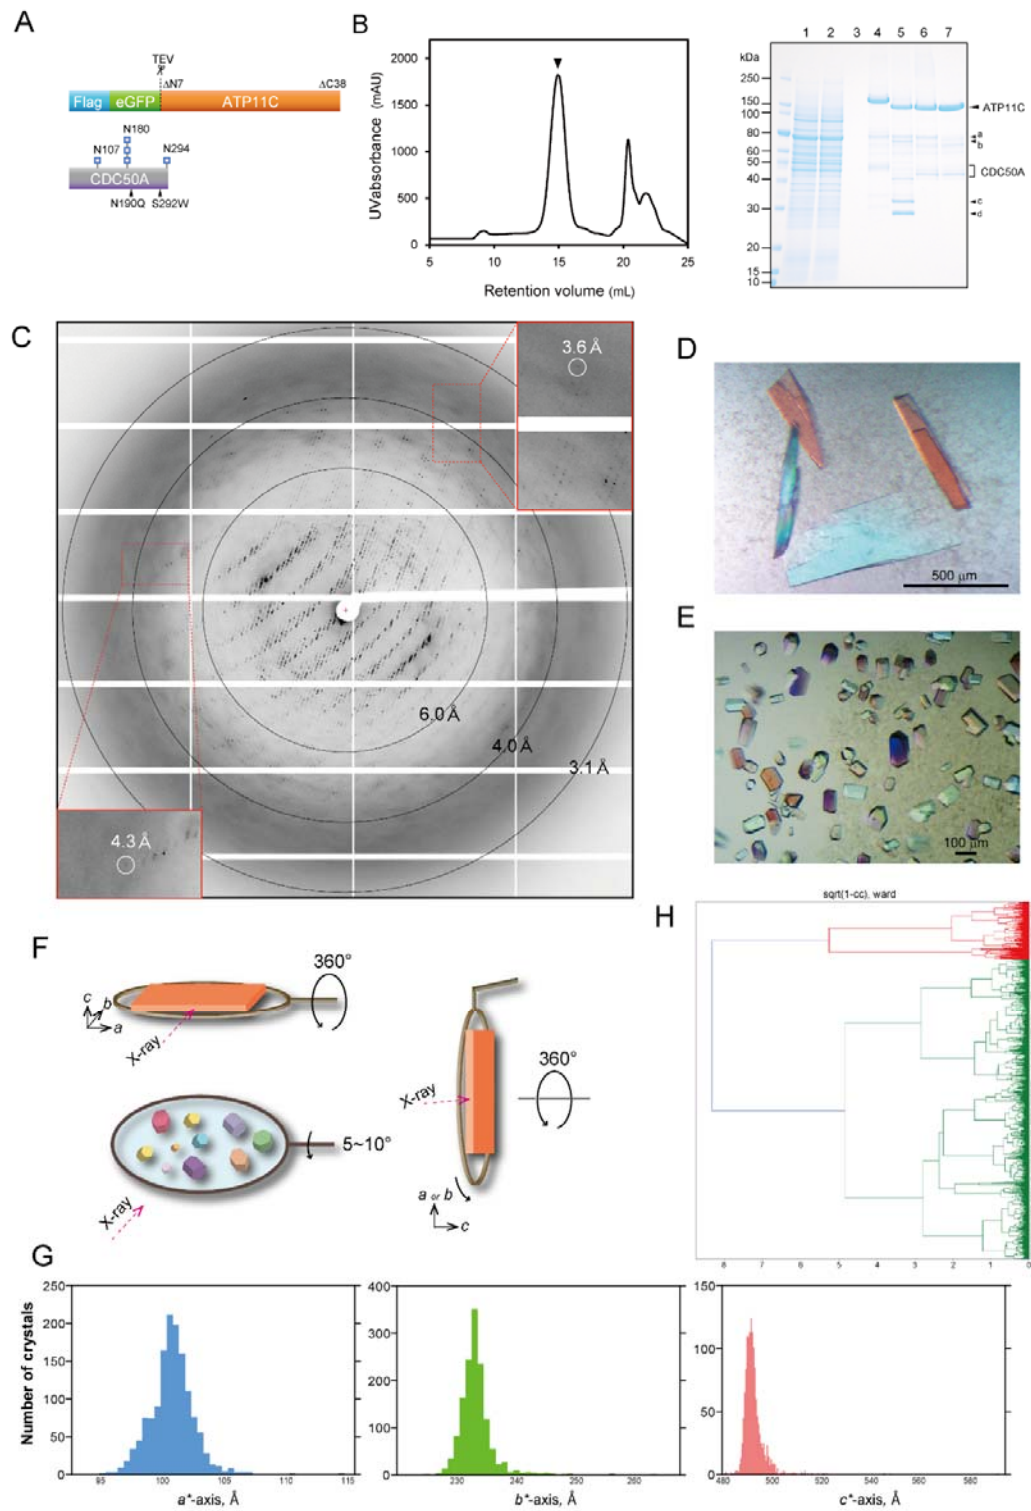

780

781

782 Fig. S1. Structural determination of ATP11C-CDC50A complex

783 (A) Construction of TP11C and CDC50A used in crystallization. See Methods for

784 details. (B) Purification of ATP11C-CDC50A complex. Lane 1: solubilized cell lysate,  
785 lane 2: pass-through of Flag resin, lane 3: wash fraction, lane 4: elution by Flag peptide  
786 (subjected to ATPase assay), lane 5: TEV proteinase- and endoglycosidase-treated  
787 sample, lane 6: pass-through fraction of Ni-NTA and amylose resin, lane 7: concentrated  
788 peak fractions by size-exclusion chromatography (arrowhead in the left panel).  
789 Arrowheads on the right indicated as follows, a: HSP70, b: EndoHf, c: cleaved eGFP, d:  
790 TEV proteinase. The elution profile of ATP11C-CDC50A complex by size-exclusion  
791 column chromatography is shown on the left. (C) Representative X-ray diffraction  
792 obtained from a plate-like crystal shown in D. Diffraction spots better than 3.6Å were  
793 obtained along the  $c^*$ -axis, whereas these are limited to around 4~6Å in directions along  
794 with  $a^*$ - and  $b^*$ -axes, thus strongly anisotropic. (D,E) Three-dimensional crystals  
795 obtained from the samples purified from Expi293 cells, showing thin, but large  
796 plate-like crystals (D). In contrast, small crystals were obtained from CDC50A-KO cells  
797 (E). (F) Data acquisition strategy. We employed normal type LithoLoops for helical  
798 scan data acquisition from large single crystals. However, because crystals showed  
799 strong anisotropy, we also collected data sets by irradiating X-ray beam from the  
800 direction perpendicular to the  $c$ -axis by using 90° bent type LithoLoops. For the small  
801 but well diffracting crystals obtained from CDC50A-KO cells, data from each  
802 individual crystals was collected for 10°. All of these crystals showed identical unit cell  
803 size and symmetry regardless of crystal morphologies and expression cell types, as seen  
804 in the histograms of unit cell dimensions (G). All diffraction data from 1,588 crystals  
805 were finally merged into a single data set (H), and used for the molecular replacement.

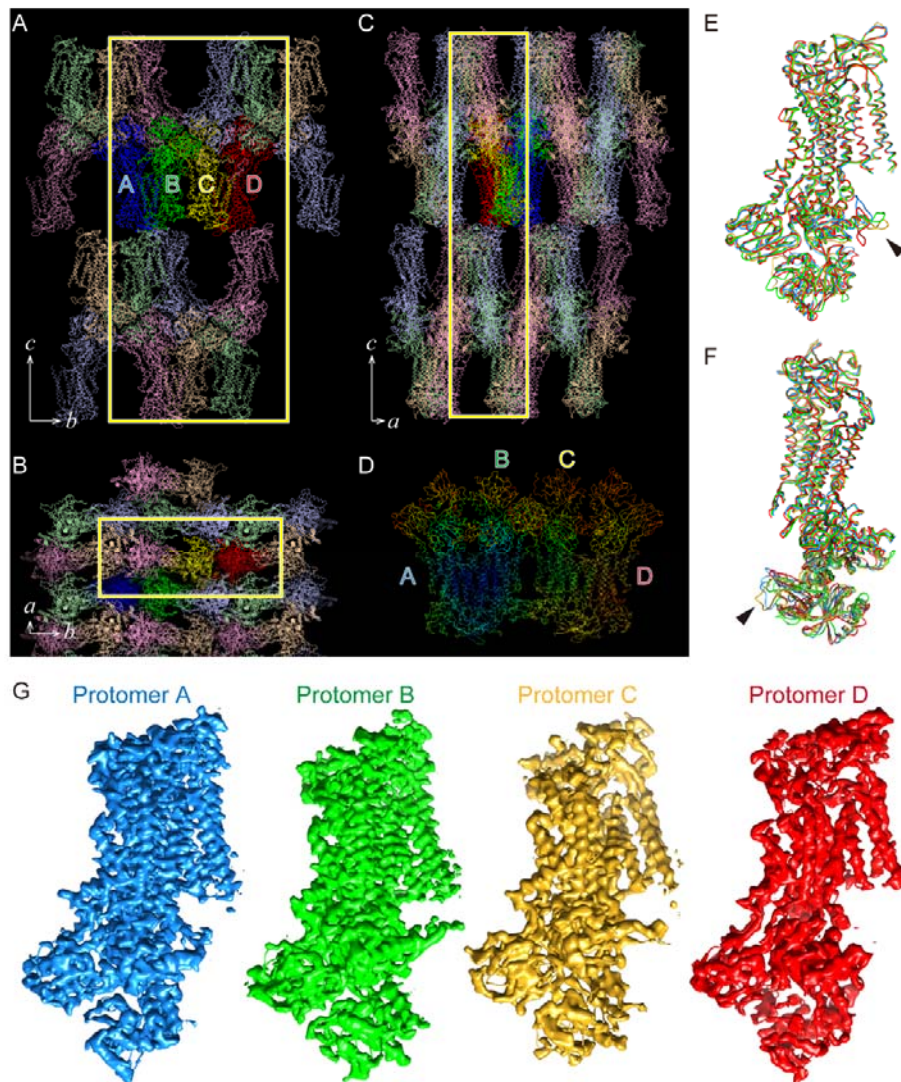

806

807 Fig. S2. Crystal packing.

808 (A-C) An asymmetric unit contains four protomers (A, B, C and D) shown in blue,

809 green, yellow and red, respectively. Their symmetry-related molecules are shown in

810 light colors. Yellow boxes indicate unit cells view from different direction in A-C as

811 indicated in the figures. (D) Molecules in the asymmetric unit are displayed according

812 to their temperature factors. Colors gradually change from blue (16) to red (283). (E,F)

813 Comparison of the molecular conformation of four protomers. Arrowheads indicate loop

814 structures, the conformations of which are variable among the four protomers. (G)

815  $2F_o - F_c$  electron density maps of the four protomers at the same contour level of  $1.5\sigma$ .

816

817

818

819

820

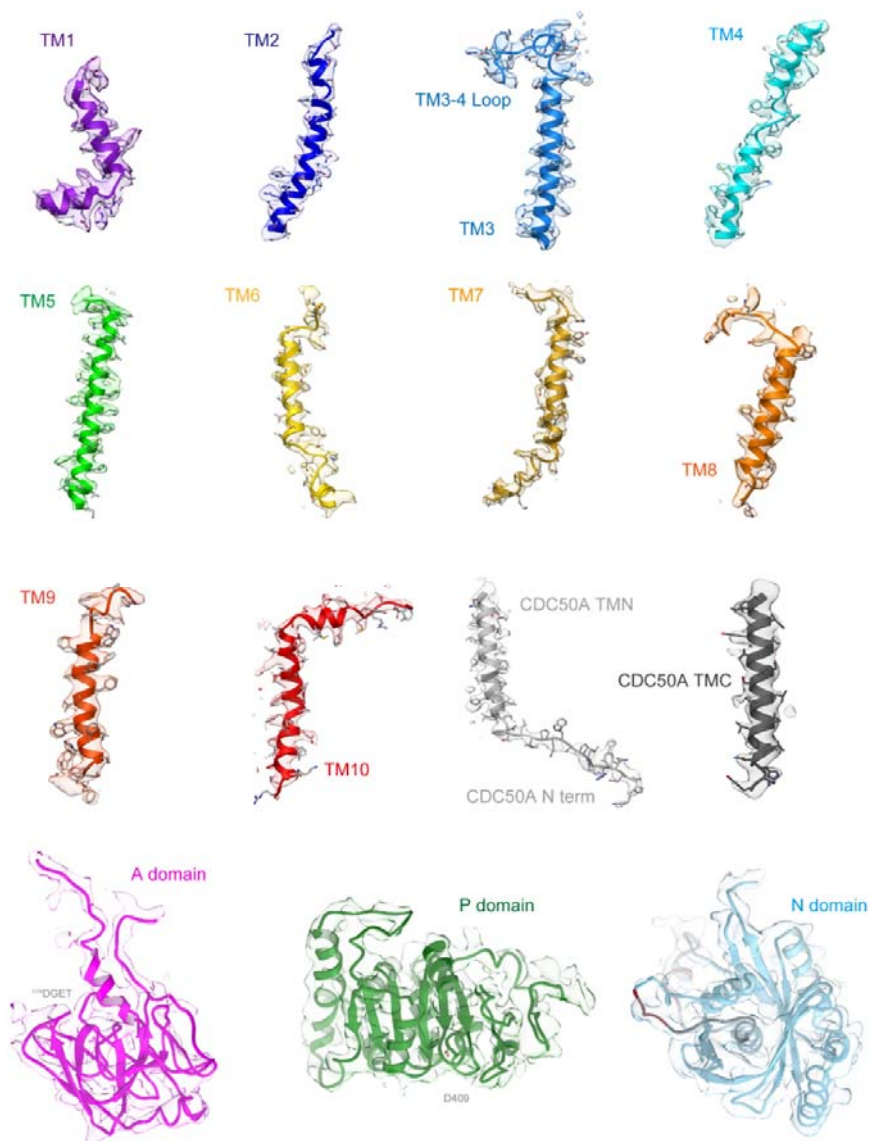

821

822

823 Fig. S3. Electron density maps

824 Surface represents  $2F_o - F_c$  electron density maps of the indicated regions with  $1.5\sigma$

825 contour level. Color code as in Fig. 1.

826

human\_ATP11C 1 -----AN7-----A-domain  
human\_ATP11A 1 -----MDCSLVRTLVRHCAGE-ENWVDSRTIYVGHREPPPGAEAYIPQRYPDNRIV 51  
human\_ATP8A1 1 ---MPTMRRTVSEIRSAEGYEKTDVSEKTSADLAD-EEV--RTIFINQ-----PQLT---KFCNNHVS 55  
bovine\_ATP8A2 3 LAHSWRRYCSIGPVRPPPGYKKADEMSRATSVGD-QLDVPARTIYLNQ-----PHLN---KFCDNQIS 62  
yeast\_Drs2 141 AVTNNELDDNYLDSRNKFNILFNRYILRKNVGDAGEGNPEPRVIHIND-----SLANSSFGYSDNHIS 204  
-: : \*-:-- - : : : \*

human\_ATP11C 47 SSKYTLWNFLPKNLFQFRRIANFYFLIIFLVQVIVD-TPTSPTVSGLPLFFVITVTAIKQGYEDWLRHR 115  
human\_ATP11A 47 SSKYTFWNFIKPNLFQFRRVANFYFLIIFLVQLIID-TPTSPTVSGLPLFFVITVTAIKQGYEDWLRHK 120  
human\_ATP8A1 56 TAKYNIIITFLPRFLYSQFRRANSAFFLFIALQQIPVSPTRGYTTLVPLLFILAVAAIKIEIEDIKRHK 125  
bovine\_ATP8A2 63 TAKYSVVTFLPRFLYEQIRRAANAFLLFIALQQIPVSPTRGYTTLVPLLIILTIAGIKEIVEDFKRHK 132  
yeast\_Drs2 205 TTKYNFATFLPKFLFQEFKYNANFLFLCTSAIQVPHVSPTRNYTTIGTLLVVLIVSAMKEIEDIKRAN 274  
::\*\*-- -:\* :\*: : : \*\* : \*\* : \* - : \*\* - : : : : : \* \* \* \*

human\_ATP11C 116 ADNEVNKSTVYIIEANAKRVKRE--SEKIKVGDVVEVQADETFPCDLILLSSCTTDGTCYVTTASLDGESS 183  
human\_ATP11A 121 ADNANMNCQPVHFHQKGLVRRKQ--SRKLRVGDIVMVKEDTFPCDLIFLSSNRGDGTCVTTASLDGESS 188  
human\_ATP8A1 126 ADNANVKKQTVLRNGANIEIVH--WEKVAVGEIVKVTNGEHLPADLISLSSSEPOAMCYIETSNLDGETN 193  
bovine\_ATP8A2 133 ADNANVKKKTIVLRNGMWTIV--WKEVAVGDIVKVVNGQYLPADVLLSSSEPOAMCYVETANLDGETN 200  
yeast\_Drs2 275 SDKELNNSSTAEIFSEAHDDFVEKRWIDRVGDIIRVKSEEPADTILSSSEPEGLCYIETANLDGETN 344  
:\* : \*: - - : - - - : \* : : \* : : \* : : \* : : \* : : \* : : \* : : \* : : \* : : \* : : \*

human\_ATP11C 184 CKTHYAVRDTIALCTAESIDTLRAAIECEQPDPDLYKFVGRINIIYSNSLEAVARSLGPNLLKGGATLKN 253  
human\_ATP11A 189 HKTHYAVQDITKGFHEEDIGGLHATIECEQPDPDLYKFVGRINIVSNDLNPVVRPLGSENLKGLRATLKN 258  
human\_ATP8A1 194 LKIRQGLPATSDIKDVLRLRISGRIECPENRHLDFVGNIRLDGHC---TVPLGADQILLRGAQLRN 259  
bovine\_ATP8A2 201 LKIRQGLSHTADMQTRVFLMQLSGTIECEGNRHLDFGTGNLNDGKS---PVALGPDQLLRGTQLRN 266  
yeast\_Drs2 345 LKIKQSRVETAKFIDVKTLMNMGKVVSEQPNSSLYTYEGTMTLNDRQ---IPLSPDQMILRGTALRN 409  
\* : - \* : - : : - - \* : \* : \* : \* : \* : - - \* : : : \* : : \* : \*

human\_ATP11C 254 TEKIYGVAVYTGMETKMALNYQSKSQRSAVEKSNAFILVYLFIILLTKAAVCTTLKYVWQSTPYNDPEW 323  
human\_ATP11A 259 TEKIFGVAVIYTGMETKMALNYQSKSQRSAVEKSMNAFLIVYLCILISKALINTVLKYMWQSEPFRRDEPW 328  
human\_ATP8A1 260 TQWVHGVIVYTGHDTKLMQNSTSPPLKLSNVERITNVQILILFCILIAMSLVCSGVAIWNRSS-SGKNW 328  
bovine\_ATP8A2 267 TQWGFIVVYTGHDTKLMQNSTSKAPLKRNVKVTNVQILVFLGILLVMAVSSVGVALVWSSQ-SGKNW 335  
yeast\_Drs2 410 TAWIFGLVIFTGHEKTLRNATATPIKRTAVEKIINRQIIALFTVLIVLILISSIGNVIMSTAD-AKHL 478  
\* - \* : : \* : \* : \* : \* : \* : : : \* : : : : \* : : : - -

human\_ATP11C 324 YNQKTQKEREITLKVLMFTDFLSFMVLFNFIIIPVSMVITVEMQKFLGFFISWDKDFYDEEINEGALVNT 393  
human\_ATP11A 329 YNQKTESERQRNLFLKAFDFLAFMVLNFNYIIPVSMVITVEMQKFLGFFISWDKDFYDEEINEGALVNT 398  
human\_ATP8A1 329 YLNLYGGASNFGL----NFLTPIILFNLLIPISLVLTLEVVKYTAQAFINWDLDMHYEPTDAMART 393  
bovine\_ATP8A2 336 YIKKMDATSDFNGY----NLTPIIILYNLLIPISLVLTLEVVKYTAQAFINWDLDMYYLGNTPAMART 400  
yeast\_Drs2 479 YLYL-EGTNKAGLF--FKDFLTFWILFSLNLPISLFTVELIKYYQAFMIGSDLDLYYEKTDPTVVRT 544  
\* - - : : \* : \* : \* : \* : \* : \* : \* : \* : \* : \* : \* : \* : \* : \* : \* : \* : \* : \* : \* : \* : \* : \* : \*

human\_ATP11C 394 SDLNEELGQVDYVFIDKGTGLTENSMFEIECCIDGHKY-----KGVTEVDEGLSQTDTLTYFDKVDK 456  
human\_ATP11A 399 SDLNEELGQVEYIIFDKGTGLTENSMFEIEKCCIEGHVYVPHVICNGQVLPESSGID--MIDSSPSVNGR 465  
human\_ATP8A1 394 SNLNEELGQVKYIFSDKGTGLTCNMVQFKKCTIAGVAY-----GQNSQFGDEKT-----FSDSS 447  
bovine\_ATP8A2 401 SNLNEELGQVKYLFSDKGTGLTCNMVQFKKCSIAGVTYGHFPELTREPSDDFSRIPPPSSDSCDFDDPR 470  
yeast\_Drs2 545 SSVLEELGQIEYIFSDKGTGLTRNIMEFKKCSIAGHY-----IDKIPEDKTATVEDGIEVGYRKFDD 607  
\*- \* \*\*\*\*\* : \* : \*\*\*\*\* \* \* \* - \* \* \* \*

human\_ATP11C 457 NREEL-----FLRALCLCHTVEIKTNDAVDGATESA----ELTYISSSPDEIALVKGAKRYG 509  
human\_ATP11A 466 EREEL-----FFRALCLCHTVQKDDSDVDPGRKSPDGKSCVYISSSPDEVALVEGVQRGL 522  
human\_ATP8A1 448 LLENLQN-NHPTAPIICEFLTMMAVCHTAVPEREG--D-----KIIYQAASDEGALVRAAQLN 504  
bovine\_ATP8A2 471 LLKNIED-HHPTAPIQEFLLAVCHTVPVPERDGD--D-----SIVYQASSPDEAALVKGARKLG 527  
yeast\_Drs2 608 LKKKLNDSDESDPIINDFLTLATCHTIVPEFQSG--DG-----SIKYQAASDEGALVQGGADLG 666  
: : : - - : : - \* - : : - \* - : : \* : : \* : : \* : : \* : : \* : : \* : : \*

human\_ATP11C 510 FTFLGNRRGYM-RVENQRKEIEEYELLHLLNFDVRRRMSVIVKTEGDIILLFCKGADSAVFPVRQN--- 575  
human\_ATP11A 523 FTYLRRLKDNYM-EILNRNHERFERELLEILSFDVRRRMSVIVKSATGEIYLFCCKGADSSIFPRVIE--- 588  
human\_ATP8A1 505 FVFTGRTPDSD--VIIDSLGQEEERYELLNVLEFSAARKRMSVIVRTPSGKLRLYCKGADTVIYDRLAE-TS 571  
bovine\_ATP8A2 528 FVFTARTPYS--VIIIAMGQETFGILNLVLEFSSDRKRMSVIVRTPSGQLRLYCKGADNIFERLSK-DS 594  
yeast\_Drs2 667 YKFIIRKPNSSVTVLLEETGEEKEYQLNICEFNSRKRMSAIFRFPDGSIKLFCCKGADTVILERLDDEAN 736  
: : : : : - : : : \* - \* : \* : \* : \* : \* : \* : \* : \* : \* : \* : \* : \* : \*

827  
828  
829  
830



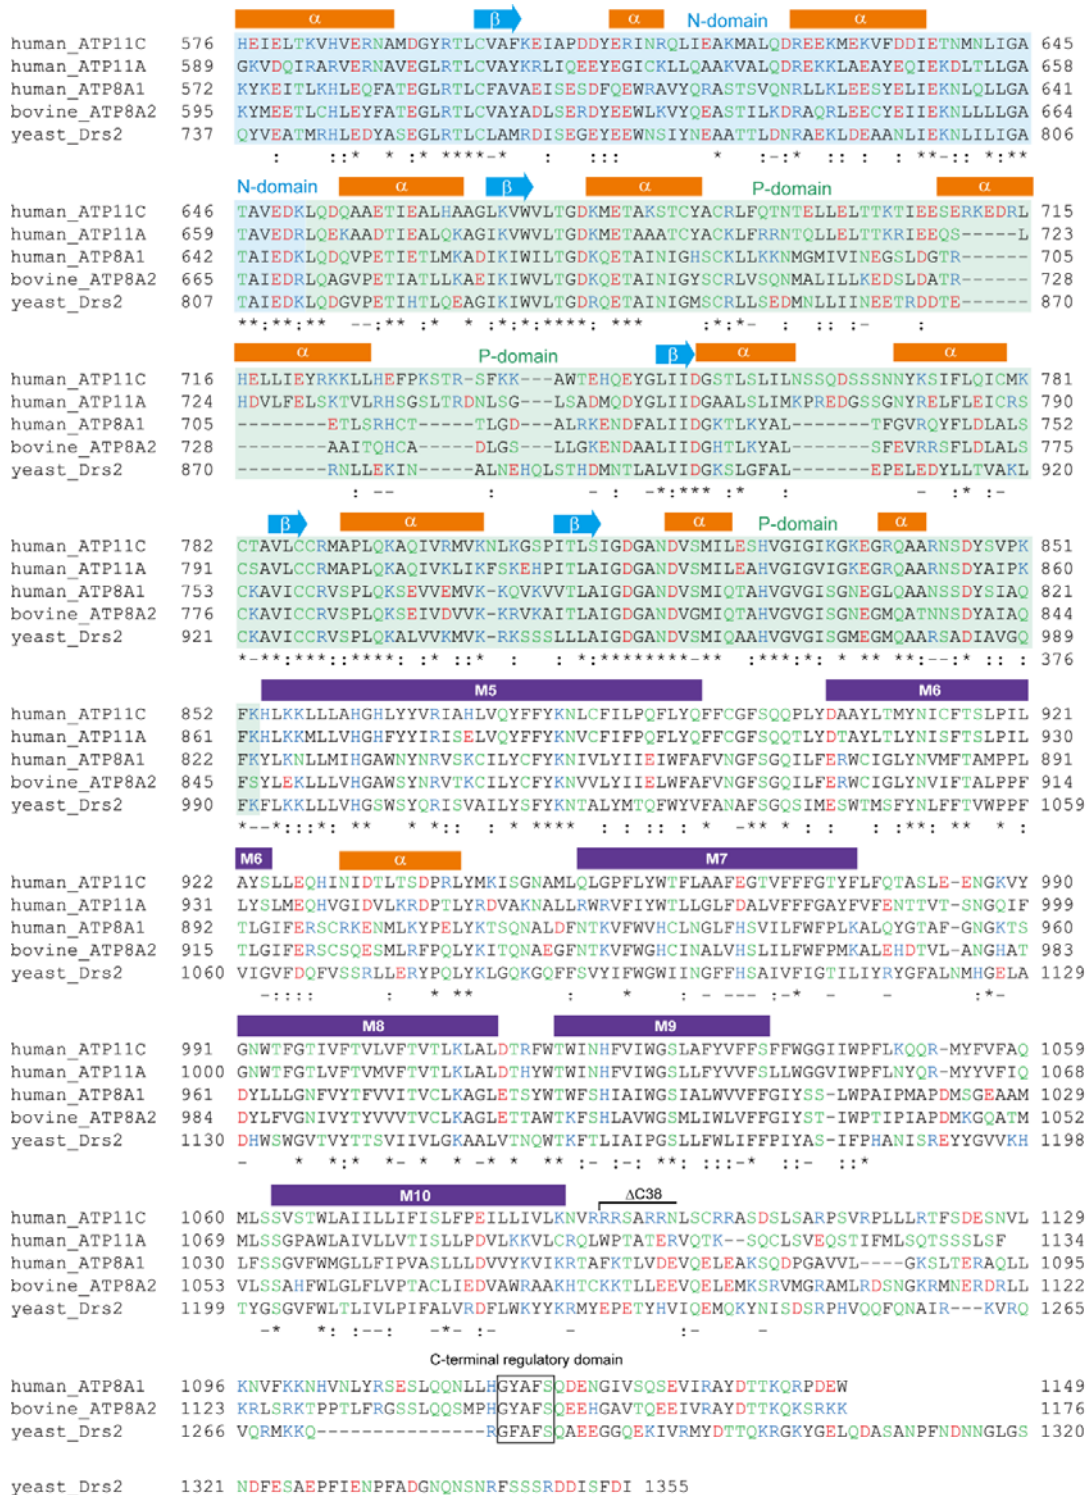

835 edited. Cytoplasmic domains (A, pink; P, green; N, light blue), secondary structures  
836 ( $\alpha$ -helices,  $\beta$ -sheets and TM helices) and mutations introduced for the crystallized  
837 construct ( $\Delta$ N7,  $\Delta$ C38) are indicated above the alignment. The degree of conservation  
838 among evaluated sequences is indicated below the alignment. Acidic, basic, hydrophilic  
839 or hydrophobic amino acids are indicated as red, blue, green and black characters,  
840 respectively. Gene and protein ID is as follows; human ATP11C  
841 (NCBI: XM\_005262405.1), human ATP11A (Uniprot: P98196-1), human ATP8A1  
842 (UniProt: Q9Y2Q0-2), bovine ATP8A2 (Genebank: GQ303567.3), and *Saccharomyces*  
843 *cerevisiae* Drs2 (UniProt: P39524-1).  
844

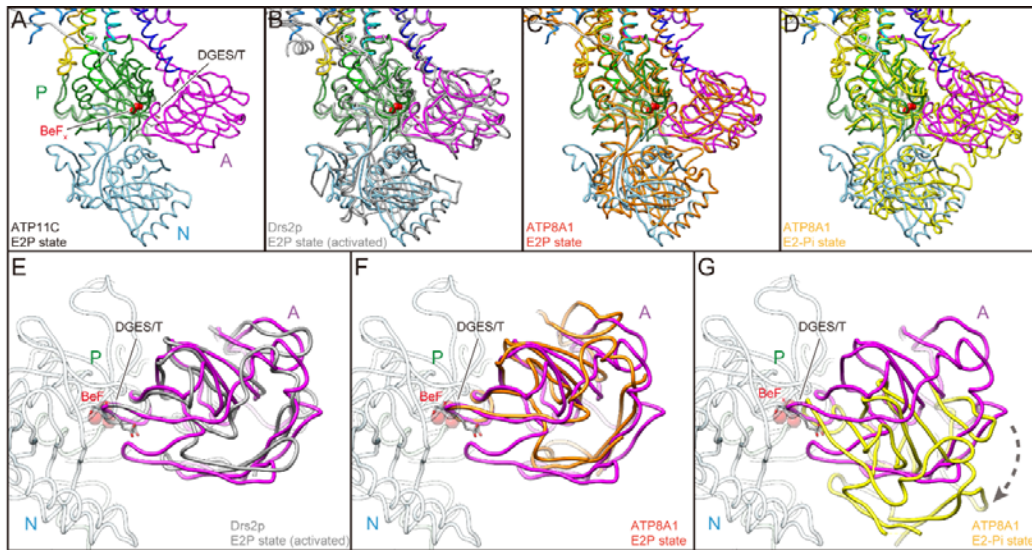

845

846 Fig. S5. Cytoplasmic domains

847 (A-D) Comparison of the relative orientation of the cytoplasmic domains viewed along  
848 with the membrane plane. Cytoplasmic domains of ATP11C are shown in worm models  
849 with the same colour code as in Fig. 1C (A). Atomic models of Drs2p in E2P activated  
850 form (B, grey), ATP8A1 E2P form (C, orange) and ATP8A1 E2-P<sub>i</sub> form (D, yellow) are  
851 superimposed on the ATP11C structure according to their P domain structures to show  
852 relative orientations of A and N domains. (E-G) Azimuthal position of the A domain is  
853 compared. A domain of Drs2p (E), ATP8A1 E2P state (F) and E2-P<sub>i</sub> state (G), and these  
854 models are superimposed on the ATP11C structure (only A domain is highlighted in  
855 magenta, and others are shown in transparent colors) as in A-D. Dotted arrow indicates  
856 the different azimuthal positions between ATP11C E2P state and ATP8A1 E2-P<sub>i</sub> state.  
857 Phosphate analogue BeF<sub>x</sub> (red spheres) and DGES/T motif (sticks) in ATP11C structure  
858 are highlighted in all figures.

859

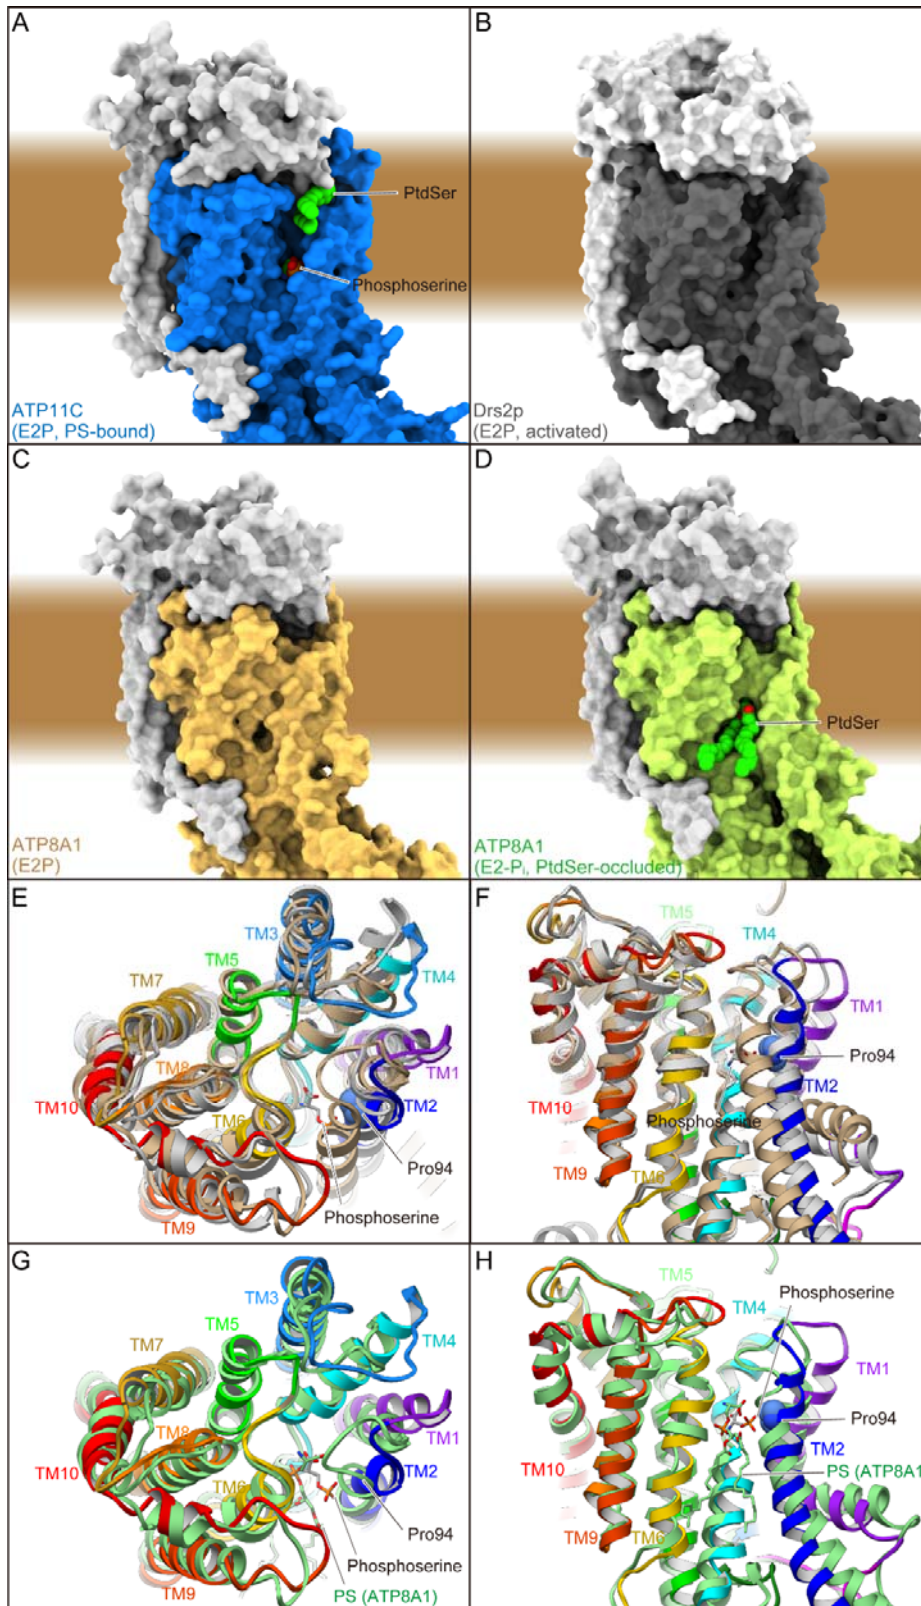

861 Fig. S6. Comparison of membrane crevices  
862 (A-D) Surface representation of the atomic models of ATP11C E2P state (A), Drs2p  
863 E2P activated form (B), ATP8A1 E2P (C) and E2-P<sub>i</sub> state (D). PtdSer and phosphoserine  
864 are indicated as spheres. Brown background indicates approximate location of the lipid  
865 bilayer. (E-H) Comparison of the TM helix arrangement in ribbon representation.  
866 Atomic models of ATP11C (color codes as in Fig. 1), Drs2p (light grey) and ATP8A1  
867 (tan) are aligned according to their TM helices (E,F). ATP8A1 E2-P<sub>i</sub> transition state  
868 (light green) is also compared with ATP11C E2P state (G,H) Only catalytic subunits are  
869 shown in the figure, viewed from the exoplasmic side (E,G) or perpendicular to the  
870 membrane plane with exoplasmic side up (F,H). Phosphoserine (sticks) and Pro94  
871 (spheres) in ATP11C, and PtdSer occluded in ATP8A1 E2-P<sub>i</sub> state (sticks) are indicated  
872 in the figure.

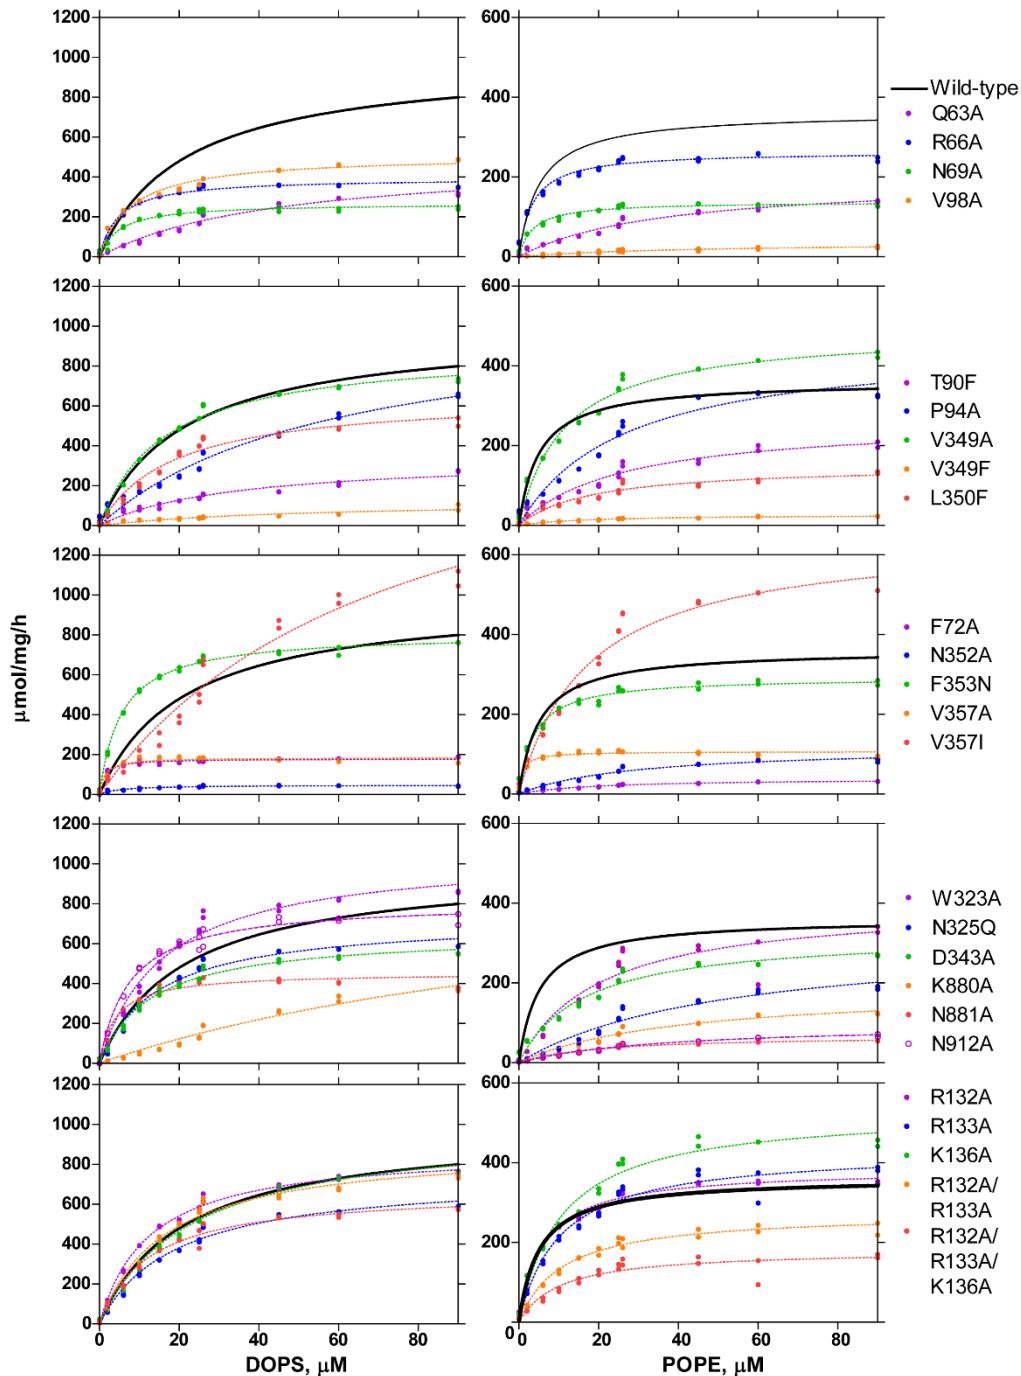

873

874 Fig. S7. Phospholipid-dependence of ATPase activity for mutants.

875 ATPase activities of indicated mutants are plotted as a function of DOPS (left) or POPE

876 (right) concentration. Mutants are categorized as follows; cytoplasmic gate (1st row),

877 surface of the membrane cleft (2nd row), occlusion site (3rd row), TM3-4 loop at

878 exoplasmic cavity and residues in TM5 and 6 (4th row), and CDC50A exoplasmic

879 domain facing the cavity (5th row). ATPase activity for the wild-type enzyme is shown

880 in all graphs as a control (black lines).

881

| ATP11C E2P                                              |                                                       |
|---------------------------------------------------------|-------------------------------------------------------|
| <b>Data collection</b>                                  |                                                       |
| Resolution (Å) †                                        | 4.7 × 4.2 × 3.9 (4.0 – 3.9)‡                          |
| Space group                                             | <i>P</i> 2 <sub>1</sub> 2 <sub>1</sub> 2 <sub>1</sub> |
| Cell dimensions                                         |                                                       |
| <i>a</i> , <i>b</i> , <i>c</i> (Å)                      | 100.46, 232.82, 498.89                                |
| α, β, γ (°)                                             | 90, 90, 90                                            |
| <i>R</i> <sub>merge</sub>                               | 1.141 (–)                                             |
| <i>R</i> <sub>rim</sub>                                 | 0.0419 (–)                                            |
| <i>I</i> /σ <i>I</i>                                    | 15.88 (0.21)                                          |
| <i>C</i> / <i>C</i> <sub>1/2</sub>                      | 0.92 (0.864)                                          |
| Completeness (%)                                        | 71.32 (11.64)                                         |
| Redundancy                                              | 776.9 (698.5)                                         |
| <b>Refinement</b>                                       |                                                       |
| Resolution (Å)                                          | 50 – 3.9 (4.0 – 3.9)                                  |
| No. of reflections                                      | 82706647 (7342288)                                    |
| <i>R</i> <sub>work</sub> / <i>R</i> <sub>free</sub> (%) | 27.9/34.8 (26.8/32.6)                                 |
| Wilson B-factor                                         | 98.19                                                 |
| No. of atoms                                            |                                                       |
| Protein                                                 | 44727                                                 |
| Ligands                                                 | 444                                                   |
| Average B-factor                                        |                                                       |
| Protein (Å <sup>2</sup> )                               | 163.10                                                |
| Ligands (Å <sup>2</sup> )                               | 172.65                                                |
| R.m.s deviations                                        |                                                       |
| Bond lengths (Å)                                        | 0.007                                                 |
| Bond angles (°)                                         | 1.35                                                  |

882

883

884 **Table S1. Data collection and refinement statistics**

885 †The diffraction data are anisotropic. The resolution limits given are for the *a*\*, *b*\* and  
886 *c*\* axes, respectively.

887 ‡Statistics for the highest-resolution shell are shown in parentheses.

888 \*Statistics for the highest-resolution shell are not given due to the strong anisotropy.

889

890
